1     **Structural brain connectivity predicts acute pain after mild traumatic**  
2                                                             **brain injury**

3     Paulo Branco<sup>1,2,†</sup>, Noam Bosak<sup>3,4,†</sup>, Jannis Bielefeld<sup>1,2,†</sup>, Olivia Cong<sup>1,2</sup>, Yelena Granovsky<sup>3,4</sup>  
4                     Itamar Kahn<sup>5</sup>, David Yarnitsky<sup>3,4,&</sup>, A. Vania Apkarian<sup>1,2,&\*</sup>  
5

6     **Author affiliations:**

7     <sup>1</sup>Department of Neuroscience, Northwestern University Feinberg School of Medicine, Chicago,  
8     USA

9     <sup>2</sup>Center for Translational Pain Research, Northwestern University Feinberg School of Medicine,  
10    Chicago, USA

11    <sup>3</sup>Rappaport Faculty of Medicine, Technion – Israel Institute of Technology, Haifa, Israel

12    <sup>4</sup>Department of Neurology, Rambam Health Care Campus, Haifa, Israel

13    <sup>5</sup>Department of Neuroscience and Zuckerman Mind Brain Behavior Institute, Columbia  
14    University, New York, USA.

15  
16    \*Correspondence to: Dr. A. Vania Apkarian (AVA)

17    [a-apkarian@northwestern.edu](mailto:a-apkarian@northwestern.edu)

18  
19    <sup>†</sup>**These authors contributed equally to this work.**

20    <sup>&</sup>**These authors also contributed equally to this work.**  
21

22  
23    **Short title:** Brain connectivity predicts pain in mTBI

## 24 **Abstract**

25 Mild traumatic brain injury, mTBI, is a leading cause of disability worldwide, with acute pain  
26 manifesting as one of its most debilitating symptoms. Understanding acute post-injury pain is  
27 important since it is a strong predictor of long-term outcomes. In this study, we imaged the brains  
28 of 172 patients with mTBI, following a motorized vehicle collision and used a machine learning  
29 approach to extract white matter structural and resting state fMRI functional connectivity measures  
30 to predict acute pain. Stronger white matter tracts within the sensorimotor, thalamic-cortical, and  
31 default-mode systems predicted 20% of the variance in pain severity within 72 hours of the injury.  
32 This result generalized in two independent groups: 39 mTBI patients and 13 mTBI patients without  
33 whiplash symptoms. White matter measures collected at 6-months after the collision still predicted  
34 mTBI pain at that timepoint (n = 36). These white-matter connections were associated with two  
35 nociceptive psychophysical outcomes tested at a remote body site – namely conditioned pain  
36 modulation and magnitude of suprathreshold pain–, and with pain sensitivity questionnaire scores.  
37 Our validated findings demonstrate a stable white-matter network, the properties of which  
38 determine a significant amount of pain experienced after acute injury, pinpointing a circuitry  
39 engaged in the transformation and amplification of nociceptive inputs to pain perception.

## 40 **Introduction**

41 Traumatic brain injury is a leading cause of death and disability in the United States(1), with  
42 important socioeconomic costs. Motor vehicle collisions are a frequent cause of mild TBI (mTBI),  
43 which often is accompanied with whiplash associated disorders (WAD) given the quick shift of  
44 forces during a crash and the consequent abrupt and brisk back-and-forth movement of the neck.  
45 These patients usually present with a range of clinical symptoms including stiffness, dizziness,  
46 nausea, and mental confusion, but the most frequent and debilitating clinical manifestation is pain  
47 in the head/neck area(2), which may last from days to weeks and – for a large proportion of patients  
48 – can become chronic(3). Managing pain post-injury is of utmost importance since it reflects on  
49 the patients’ recovery process: mTBI patients with acute pain-related disabilities are at higher risk  
50 for chronic pain(3) and are more likely to develop clinically significant anxiety, depression, sleep  
51 disturbances, and post-traumatic stress disorder(4)

52       Early acute pain after mTBI is, however, poorly understood. The etiology of pain does not  
53 map well onto injury-related imaging findings(5)-(6)-(7) and is only partially explained by  
54 psychological and psychophysical pain characteristics(8,9). It is known that psychological factors  
55 play a role in early acute pain, with state anxiety, depression, and pain catastrophizing modestly  
56 explaining additional variance in pain severity(10). At the chronic stage, it is also known that these  
57 patients have altered psychophysical pain indices, including hyperalgesia to painful stimuli,  
58 inefficient conditioned pain modulation, and enhanced temporal summation of pain(11). While it  
59 is thought that both pro-nociceptive and affective/emotional processes are driven by brain-centric  
60 mechanisms, so far, no studies have examined the brains of these patients in relation to acute mTBI  
61 pain. Consequently, how the central nervous system reacts to, is changed by, or can predispose  
62 someone to experience pain after acute mTBI injury is unknown. Peering into the subject's brains

63 and exploring the mechanisms underlying pain at the early acute stage is a promising approach to  
64 resolve the relative contribution of psychological, psychophysical, and nociceptive processes in  
65 post-injury pain and can shed light on the mechanisms that underlie pain perception immediately  
66 after an emotionally charged, pain-inducing incident.

67 In this study, we used MRI to study brain functional and structural properties of mTBI  
68 patients after a motorized vehicle accident and probed for properties that can determine or  
69 predispose patients to experience pain after injury. Using a machine-learning approach, we  
70 examined the functional and structural brain networks associated with early, acute pain. This study  
71 sheds light on the properties and emergence of pain, particularly after injury, with implications for  
72 the treatment and management of mTBI.

73

## 74 **Results**

### 75 **Predicting pain after mTBI using functional and structural connectivity**

76 We used a machine-learning approach to predict pain from resting-state functional magnetic  
77 resonance imaging (rsfMRI) and diffusion tensor imaging (DTI) brain connectivity. Discovery  
78 (70% of the data,  $N_{\text{rsfMRI}} = 94$  and  $N_{\text{DTI}} = 88$  after outlier exclusion) and hold-out ( $N_{\text{rsfMRI}} = 43$   
79 and  $N_{\text{DTI}} = 37$  after outlier exclusion) datasets were used to build the model and assess  
80 generalizability (see Fig. 1 and methods for an explanation of the machine-learning pipeline).  
81 For structural connectivity, after 10-folds cross-validation (CV), the best  $p$  threshold for  
82 univariate feature selection was determined to be  $p = 0.01$  (negative features model, highest CV  
83  $r_{\text{predvsactual}} = .33$ ; positive model *n.s.*), leading to the selection of 26.5 features on average, which  
84 mostly appeared inconsistently across CV folds (see Supplementary Fig. 1).

85           Only three white-matter (WM) tracts were selected on all cross-validation folds: tract 1,  
86 left Precentral gyrus - left Postcentral Gyrus; tract 2, left Thalamus - left Superior Parietal Lobule;  
87 and tract 3, right Planum Polare - left Superior Lateral Occipital Cortex (Fig. 2A). Within the  
88 discovery dataset, these three features, together, show an  $r_{predvsactual} = 0.47$  [95% CI: 0.324, 0.572],  
89 and  $p < .001$  (Fig. 2B). By applying the linear model built on the discovery dataset, we were able  
90 to predict patient's pain in the hold-out dataset (Fig. 2B): the model showed a  $r_{predvsactual} = 0.43$   
91 [95% CI: 0.158, 0.593],  $p = .007$ , thus suggesting generalizability. We further examined if the WM  
92 connectivity model could predict pain in the sub-sample of mTBI patients without whiplash  
93 symptoms (WAD score = 0, N = 13). Since these subjects were not used in previous analyses, they  
94 represent a second independent group on which generalizability can be assessed. The model was  
95 again successful at predicting patients' pain and had a  $r_{predvsactual} = .53$  [95% CI = 0.058, 0.697],  
96 see Fig. 2B, although this correlation did not reach significance ( $p = .061$ ), potentially due to the  
97 small sample size. Meta-analytical prediction metrics were obtained by assessing the pooled  
98 prediction performance in the three datasets (N = 138). Results replicate the previous findings,  
99 with a  $r_{predvsactual} = .44$  [95% CI = 0.320, 0.532],  $p < .001$ , see Fig. 2C. For the three tracts, WM  
100 connectivity was significantly correlated with pain ratings (all  $r_s > -0.3$ ,  $p_s < .001$ ), with higher  
101 connectivity strengths leading to lower observed pain (Fig 2D). Finally, to discard the possibility  
102 that the WM connectivity strength is associated with the severity of the clinical manifestation we  
103 explicitly compared the connectivity strength of the three tracts between patients with a WAD  
104 score of 0, 1 and 2, reflecting whiplash signs and symptoms severity. A one-way ANOVA showed  
105 no significant differences in connectivity between groups ( $F(2,135) = 1.11$ ,  $p = .33$ , Fig. 2E).

106           For rsfMRI analyses, no statistically significant model emerged for either the positive or  
107 negative features model at any threshold (see Supplementary Fig. 2). Hence, we conclude that

108 using this approach, rsfMRI is unable to predict early acute pain. Further analyses are reported for  
109 structural analyses only.

110

### 111 **Model predictions do not depend on age, sex, total intracranial volume**

112 We next asked whether this finding could be explained by confounds, such as age, sex, and total  
113 intracranial volume (TIV). We conducted a sequential linear regression on the discovery dataset  
114 with age, sex, and TIV as independent variables and pain as the dependent variable. This model  
115 was not significant ( $p = .074$ ) and only explained 4.6% of the variance in pain ratings. Adding the  
116 structural connectivity score to this model resulted in a significant model that explained 22% of  
117 the variance in the pain ratings ( $p < .001$ ); this increase in explained variance was statistically  
118 significant (model 1 vs. model 2,  $F[1, 83] = 20.29$ ,  $p < .001$ ).

119

### 120 **Spatial specificity within thalamic and somatosensory networks**

121 Given that the sensorimotor network follows a somatotopic organization and the thalamus has  
122 well-characterized nuclei implicated in multiple sensory and affective processes, we further tested  
123 the spatial specificity of both regions. Thus, brain regions from the left precentral and postcentral  
124 gyrus were parcellated based on their body-part representation (face, arm, trunk, leg) using masks  
125 published previously(12) (Fig. 3A). The connectivity between each pair of regions was estimated  
126 and correlated with baseline pain. The number of connections between the precentral-postcentral  
127 face ( $r = -.26$ ,  $p = .004$ , Fig. 3A), the precentral-postcentral arm area ( $r = -.24$   $p = .008$ ), and  
128 precentral arm and postcentral face ( $r = -.21$ ,  $p = .019$ ), were significantly associated with pain  
129 ratings.

130 We also examined the left thalamus using the FSL thalamic connectivity atlas(13),  
131 containing seven regions of interest (ROIs), each highlighting connectivity to different brain areas  
132 (prefrontal, premotor, motor, sensory, parietal, occipital, temporal). The connectivity between each  
133 thalamic ROI and the left Superior Parietal Lobule (SPL) was calculated and correlated with  
134 reported pain. We found evidence of spatial specificity – the thalamic nucleus most predictive of  
135 pain was the subregion mostly connected to the Parietal cortex, corresponding spatially to the  
136 posterior lateral thalamus area ( $r = -.30$ ,  $p < .001$ , Fig. 3B); further, we also observed strong  
137 associations between the connectivity of the prefrontal ROI and left SPL, tapping into more  
138 anterior-medial thalamus ( $r = -.30$ ,  $p < .001$ ). We further observed significant correlations between  
139 lateral thalamic nuclei connecting to sensory ( $p = .009$ ), motor, and premotor areas ( $p = 0.027$ , and  
140  $p = .017$ , respectively). The other thalamic ROIs (connected to the temporal and occipital cortex)  
141 were not significantly associated with pain.

142

### 143 **Predictive brain parameters are associated with psychophysical indices of pain** 144 **sensitivity**

145 To ground these findings in clinical properties, we tested for an association between brain,  
146 psychophysical and clinical parameters. We found significant positive associations between WM  
147 connectivity strength of all tracts and the conditioned pain modulation (CPM,  $r = .21$ ,  $p = .019$ ),  
148 the temperature at which subjects rated a pain of 50/100 (suprathreshold pain, termed Pain50(8),  
149  $r = .20$ ,  $p = .027$ ), as well as negative associations with scores in the pain sensitivity questionnaire  
150 (PSQ,  $r = -.19$ ,  $p = .038$ ). Individually, pressure-pain CPM response was mostly associated with  
151 precentral-postcentral connectivity ( $r = .25$ ,  $p = .006$ ), while connectivity between the right Planum  
152 Polare and the superior Lateral Occipital Cortex was associated with the perceived stress scale ( $r$

153 = .20,  $p = .034$ ). Other clinical and psychological parameters did not show significant results (Fig.  
154 4A).

155         Given that these clinical parameters have been previously associated with pain ratings in  
156 these individuals(8,9), we further wanted to disentangle the relative contribution of these  
157 psychological and psychophysical dimensions to that of the brain. To do so, we performed a  
158 relative importance analysis (using the R package *relaimpo*(14)). While the total model with the  
159 four parameters (CPM, Pain50, PSQ, and Brain Connectivity) explained 33.6% of the variance in  
160 pain ratings (Fig. 4B), brain connectivity alone explained 15% unique variance in pain ratings.

161

## 162 **The predictive ability of the model is not contingent on machine-learning** 163 **pipeline**

164 In order to ensure these results were not contingent on the modelling approach, we repeated the  
165 analyses using a simple linear regression combining both positively and negatively associated  
166 tracts and without summing the tracts into a single value. After cross-validation, the best  
167 performing threshold for feature selection was  $p = .005$  ( $CV r_{predvsactual} = .15$ ), leading to two highly  
168 reliable features (tract 1, left Precentral gyrus - left Postcentral Gyrus; tract 2, left Thalamus - left  
169 Superior Parietal Lobule; tracts 1 and 2 from the previous analyses). Within the discovery dataset,  
170 the model obtained an  $r_{predvsactual} = 0.37$  [95% CI: 0.192, 0.503],  $p < .001$ . Within the hold-out  
171 dataset, this model obtained a  $r_{predvsactual} = .40$  [95% CI: 0.115, 0.577],  $p = 0.014$ . Unsurprisingly,  
172 predictions and statistical results from machine-learning and linear regression models were similar,  
173 with the correlation of predicted pain values from both methods being  $r = .90$  and  $.96$  for the  
174 discovery and hold-out datasets, respectively.

175



176 **Structural connectivity parameters are stable over time, and explain future**  
177 **pain**

178 Since this study is part of a larger project aimed at discovering brain predictors of transition into  
179 chronic pain in mTBI patients, we examined the pain-ratings of these patients over time. The  
180 strength of WM connectivity at baseline was associated with patients' pain one, three, and six  
181 months after baseline (all  $ps < .05$ , Fig. 4E). This effect, however, was substantially reduced when  
182 controlling for pain ratings at baseline. We then assessed whether these connectivity indices were  
183 static in time; hence, we examined DTI data from a sub-sample of these patients that repeated the  
184 MRI protocol at six months ( $N = 36$ ) and one year ( $N = 13$ ) after injury. We compared, within-  
185 subject, whether the connectivity strength of the three tracts changed over time. Paired t-tests show  
186 that the connectivity does not change over time ( $p = .74$ ,  $p = .52$ , 6 months and 1 year, respectively,  
187 Fig.5A). Importantly, DTI parameters collected at six months post-injury were also significantly  
188 associated with pain at six months ( $r = -.41$ ,  $p = .012$ , see Fig. 5B). This result, however, did not  
189 hold at one year after injury ( $r = .25$ ,  $p = .4$ ), despite DTI parameters not changing and a significant  
190 proportion of patients (50%) still reporting pain.

191

192 **Discussion**

193 In this study, we examined the brains of mTBI patients suffering from early acute pain, attempting  
194 to characterize brain networks underpinning acute pain after a motorized vehicle collision injury.  
195 Our results can be summarized in four key points. First, we show that white-matter brain properties  
196 – but not functional properties – explain a sizable variance of the pain after mTBI, hence  
197 predisposing patients to report more pain after acute injury. Second, we demonstrate that these  
198 findings are not dependent on injury-related, clinical, or demographic characteristics of the

199 patients. Third, these white-matter connections map well onto physiological-psychological  
200 characteristics, namely through interactions with quantitative sensory testing parameters and pain  
201 sensitivity; together, these parameters can explain a third of the pain variability irrespective of  
202 tissue damage. Fourth, these connectivity parameters do not change up to a year after the injury,  
203 and connectivity metrics collected at baseline, as well as the same parameters collected at six  
204 months, are able to predict subjects' pain at six months after the initial injury. Together, these  
205 findings suggest an a-priori predisposition to pain grounded in brain WM properties, which results  
206 in higher pain ratings after acute injury. These findings shed light on brain mechanisms underlying  
207 pain sensitivity and inform the current literature of pain perception of a poorly understood patient  
208 population – mTBI patients.

209         Our study shows that an important part of the reported post-injury pain can be accounted  
210 for by brain imaging features alone. Although previous studies have successfully predicted  
211 experimental pain(15) and tonic pain(16) in healthy participants, as well as pain in patients at the  
212 chronic stage(16), this is, to the best of our knowledge, the first demonstration that early acute  
213 pain, isolated from plastic changes that occur over time after an injury, can be predicted based on  
214 brain structure. The strength of the evidence here lies in the clinical sample studied: these patients  
215 did not have any pain before injury and were scanned within hours of the accident, making them  
216 an ideal group to study injury-related, early acute pain in an ecological manner. The influence of  
217 the brain in pain perception is clear in the literature, but reports using brain structure and function  
218 to predict pain, particularly post-injury acute pain are scarce. Spisak and colleagues(17) have, for  
219 instance, recently showed that brain functional connectivity can predict pain sensitivity in healthy  
220 participants, which points to a predisposition to pain grounded on their underlying  
221 connectome(17). Here, we extend that idea by showing that injury-related pain can also be

222 predicted from the structural connectome. Within mTBI/whiplash literature, there is an ongoing  
223 discussion about the origin of the reported pain: the majority of the time, it is difficult to find  
224 imaging correlates of structural damage(5–7), and the patient’s pain is affected by psychological  
225 aspects, such as psychological distress, anxiety, depression(8,18), and seem related to insurance  
226 pay-off and work-related disabilities(19). Mapping post-injury pain to brain measures of  
227 diffusivity solidifies, at least in part, the organic basis of the patients’ pain. The fact that the  
228 networks subtending this prediction are classically implicated in nociception (rather than more  
229 limbic brain regions implicated in negative affect), together with associations between these  
230 networks and psychophysical/psychological indices related to pain sensitivity, in particular,  
231 conditioned pain modulation, and pain sensitivity questionnaire scores, further adds that at this  
232 early time-point, pain sensitivity profiles—but not psychological aspects—dominate the  
233 association with pain ratings, which fits well with previous clinical findings(8).

234 Three WM connections reliably predicted pain in these patients: they appeared on all cross-  
235 validated folds, predicted pain within-sample and predicted pain in two additional independent  
236 groups of patients. The first, and strongest, predictive feature of post-injury pain was the number  
237 of WM connections between the primary motor and sensory regions of the brain. The implication  
238 of these two regions in pain perception is not novel, given that they are well-known components  
239 of nociceptive pathways(20). It is also well established in animal studies that the precentral and  
240 postcentral gyrus have reciprocal structural connections,(21,22) which are crucial for sensorimotor  
241 integration(23–28) . In humans, imaging data supports the idea that there is strong information  
242 sharing between these two regions, both during task<sup>30</sup> and during rest(30), which has been  
243 theorized to have a role in pain perception(31). The strength of connectivity in this area was also  
244 associated with conditioned pain modulation and pain sensitivity questionnaire scores, further

245 suggesting that sensorimotor connectivity is related to pain sensitivity. This is also coherent with  
246 previous work showing that higher cortical density in the somatosensory cortex leads to less  
247 experienced pain while performing quantitative sensory tasks in healthy subjects(32) and that  
248 denser cortical thickness of the somatosensory cortex is associated with higher pain thresholds(33).  
249 In fact, it is known that the sensorimotor area is able to modulate pain, namely through direct  
250 projections to the thalamus(34). Our findings also show spatial specificity that coincide with the  
251 site of injury: connectivity between precentral and postcentral face and arm area (corresponding  
252 to the head/neck representation in the motor homunculus), as well as connectivity between the  
253 precentral face and postcentral trunk area (head/neck area in the sensory homunculus) are mostly  
254 driving these results.

255         Similarly, there is ample evidence supporting the association between the thalamus and  
256 pain as this region is the termination site of the spinothalamic tract and of nociceptive information  
257 relay to the cortex. The SPL is a multisensory, high-level integrative site for pain(35) and has also  
258 been associated with top-down modulation of pain(36). Connections between the thalamus and  
259 SPL have been described in tracing studies in rhesus monkeys, showing that the SPL projects to  
260 the ventrolateral (VL) and posterior lateral (VPL) thalamic nuclei(37). VL regions of the thalami  
261 are also connected to the parietal cortex in humans(13). This is precisely the thalamus region best  
262 predicting pain, as seen in the thalamic parcellation analysis. One recent study has shown that  
263 connections between the VL/VPL and the SPL (and the postcentral gyrus) are associated with the  
264 pathophysiology of pain(38), and higher gray matter density in the SPL has also been linked with  
265 pain sensitivity(32). Considering that SPL acts as a top-down inhibitor of sensory stimuli and given  
266 that thalamic-cortical projections from VPL to SPL are central to chronic pain, it is tempting to

267 suggest that this connectivity may play a role in the inhibition (or exacerbation) of nociceptive  
268 signals arriving at the thalamus.

269         The third tract engaged in mTBI pain connects the planum polare to the superior lateral  
270 occipital cortex. The superior lateral occipital cortex (which in the Harvard-Oxford cortical atlas  
271 extends into the IPL, see Fig. 2C) is a main integral part of the default-mode network with ample  
272 evidence of manifesting in sensory and pain-related behavior(39). Its connection with the planum  
273 polare is surprising, as this region is traditionally involved in auditory processing(40). One critical  
274 aspect is that this region is located within an area rich in crossing-fibers (within the external  
275 capsule) and near important pain-related regions, such as the insula, the secondary somatosensory  
276 cortex, and the posterior operculum. Therefore, it is likely that the loss of clear directionality within  
277 the gray matter (a well-known limitation of DTI(41,42)) led to the fibers tractography algorithm  
278 to terminate prior to reaching the actual target. This explanation is speculative and requires future  
279 studies.

280         An important question to discuss is whether these brain features reflect injury-related  
281 parameters, short-term plastic changes, or rather an a-priori predisposition to pain hard-wired in  
282 the brain. Our results favor the latter. Considering an injury-related explanation to these results,  
283 one could argue these parameters are mapping tissue injury as a proxy for pain: it is known that  
284 whiplash-like centrifugal forces may cause axonal micro-lesions that are not detectable in  
285 conventional scanning protocols(43); and these brain lesions could, in turn, reflect how severe the  
286 mTBI/whiplash injury is(44), leading to higher reported pain. We find this possibility unlikely:  
287 first, we excluded patients with WAD scores above three and patients with obvious signs of brain  
288 damage. Second, we did not find associations between connectivity strength and whiplash severity,  
289 and the model was able to predict pain in the group of patients with no whiplash-like symptoms.

290 Lastly, there are accounts that white-matter properties, namely fractional anisotropy and median  
291 diffusivity, are unaffected following mTBI(45). Another possibility is that this connectivity is  
292 reflecting short-term plastic changes caused by the new pain state. Our data does not support this  
293 hypothesis either: participants were scanned within 72h of the injury. It is unlikely that white-  
294 matter properties changed over a timespan of hours and ceased to change any further over longer  
295 timespans. There is evidence of short-term white-matter diffusivity changes in other  
296 contexts(46,47), but if the system is so malleable, one would expect to observe diffusivity changes  
297 over longer times too, especially as many participants gradually recover from their acute pain. We  
298 in fact observe no changes in connectivity strength in these WM networks from the time of the  
299 accident to six months and up to a year. Moreover, these same connections measured at six months  
300 post-injury also predict the reported pain at the same point in time, further adding strength to the  
301 within-subject reliability of this model. In conclusion, we consider it quite unlikely that our results  
302 reflect injury-related parameters or plastic changes that occur in the timespan of the data-  
303 collection; our data instead favors the idea that observed WM properties reflect an *a priori* brain  
304 predisposition for pain sensitivity.

305 While white-matter properties predicted pain quite successfully, fMRI functional  
306 connectivity did not. It is thought that functional connectivity is primarily supported by structural  
307 connectivity(48), and given the success of using resting-state to study pain sensitivity(17) and  
308 phasic pain(16), it is somewhat surprising that functional connectivity was not informative of acute  
309 mTBI pain. It is, however, important to point out key differences between DTI and rsfMRI  
310 techniques. While white-matter properties are relatively stable and should reflect primarily long-  
311 term changes in brain structure (i.e., more trait-like), rsfMRI should better reflect the emergence  
312 of a state within a given macro-structure (i.e., more state-like(49)). Given that patients were

313 scanned within 72h of a motorized vehicle accident, an often emotionally charged event that will  
314 no doubt imprint a state of anxiety and distress on the patient, it may be difficult to identify a  
315 reliable and solid pattern that generalizes across subjects, particularly given the heterogeneity of  
316 the psychological factors and their influence on functional connectivity. Importantly, the fact that  
317 only white matter is predictive of pain post-injury in the patients should be construed as further  
318 evidence that they represent stable brain circuitry implicated in the transformation and  
319 amplification of nociceptive inputs, rather than simply capturing the perception (state) of pain per  
320 se.

321         This study has some limitations. We lack a group of healthy participants, which could be  
322 used to directly ascertain if the connectivity profiles are affected by the injury itself. Also, it is  
323 necessary to mention that the absolute agreement between predicted pain and observed pain is  
324 subpar (i.e. participants with 0 pain are predicted to have an average of 30 pain). Nonetheless, the  
325 goal of this study was to infer brain mechanisms from early acute pain, rather than minimizing the  
326 error in out-of-sample prediction. Finally, our sample is quite heterogenous in several respects,  
327 including acute treatment, type of car accident, and perhaps others. Naturally, there is an vast  
328 number confounds that could have been controlled for to improve the predictive ability of the  
329 model; here, we favored a less constrained approach as it provides strength to the predictive power  
330 of our analyses - it predicts pain regardless of uncontrolled confounds.

331         In conclusion, this study shows that measures of brain diffusivity in white-matter tracts  
332 predict an important part of acute pain shortly after an injury. These tracts are implicated on  
333 nociceptive and pain-related circuitry, which may reflect preexisting pro-nociceptive or anti-  
334 nociceptive influences that either amplify or diminish the cortical interpretation of the injury-  
335 related nociceptive barrage into the subjectivity of pain. These findings lead to new questions for

336 future research: are these structural networks indeed generalizable across pain conditions? Can  
337 these connections predict acute, experimental pain in healthy subjects? The study of white-matter  
338 diffusivity in early acute pain thus opens new avenues for studying pain sensitivity and establishes  
339 dependence of pain perception, in part, on hard-wired central nervous system structures. It further  
340 provides support for the organic basis of pain perception in mTBI-whiplash patients, which is often  
341 labeled as purely psychogenic in nature.

342

## 343 **Materials and methods**

### 344 **Participants**

345 Participants included in this study were recruited at the Rambam Health Care Campus emergency  
346 department after suffering an mTBI injury from a motor vehicle accident at a maximum of 24  
347 hours before their visit. They signed an informed consent in agreement with the Declaration of  
348 Helsinki. The study was approved by the institutional review board of Rambam Health Care  
349 Campus (ref. 0601-14). All patients had direct or indirect head and neck injury, a Glasgow Coma  
350 Scale score of 13 to 15 and no subsequent decline, and were over 18 years of age. We excluded  
351 patients with imaging-based traumatic brain findings and more than 30 minutes of  
352 unconsciousness. Patients were also excluded if they had other major bodily injuries, prior chronic  
353 head/neck pain, injuries in the head/neck area within one year prior to the current injury, and  
354 neurological diseases compromising the interpretation of brain function (e.g., neurodegenerative  
355 diseases).

356 We recruited 249 patients, out of which we excluded 17 patients who did not fulfill mTBI  
357 clinical criteria, 54 patients who did not undergo MRI (claustrophobia, or not willing to  
358 participate), four patients who did not report baseline pain, and two patients with incidental MRI



359 findings. Given the current discussion on the common etiology and symptomatology of patients  
360 with WAD and mTBI(50), we decided to homogenize our sample by studying only patients  
361 fulfilling both WAD and mTBI diagnosis (90% of patients). Hence, 15 patients showed no signs  
362 of WAD (WAD score = 0) and were excluded from the main analyses. They were, however, used  
363 post-hoc, as an additional validation group. The remaining 157 subjects (mean age =  $37.3 \pm 12$   
364 years, 86 male, average pain =  $56.6 \pm 26.2$ , range 0-100) were analyzed. Not all subjects completed  
365 all MRI protocols (detailed exclusions shown in Supplementary Fig. 1).

366

### 367 **Study design and procedures**

368 After the initial emergency room visit, patients were informed about the study and were consented.  
369 Patients were then scheduled for a visit within 3 days of the injury (mean 1.7 days, range = 0–3),  
370 where they performed an MRI scan (structural, resting-state, and diffusion MRI protocols).  
371 Participants were asked to refrain from taking analgesic medication for 24 hours before the data  
372 collection. During the visit, patients were asked to rate their average pain over the previous 24  
373 hours, separately, for their neck and head using a numeric rating scale (NRS, 0–100; 0: no pain,  
374 100: worst imaginable pain); their current pain was determined to be the highest of the two.  
375 Patients also performed a series of clinical, psychological, and psychophysical tests, which are  
376 explained in detail elsewhere(8). Briefly, they filled a battery of psychological questionnaires  
377 measuring anxiety and depression (HADS(51)), pain catastrophizing (PCS(52)), pain sensitivity  
378 (PSQ(53)), stress (PSS(54)), and underwent quantitative sensory testing (conditioned pain  
379 modulation with heat and pressure stimuli, and temporal summation protocols with pressure and  
380 electrical stimuli). Some of these data are featured in other publications, examining psychophysical  
381 and psychological predictors of early acute mTBI pain(8,9).

382

### 383 **Scanner parameters**

384 All images were collected on a 3T (MR 750, SIGNA 20, GE Medical Systems, Milwaukee, USA)  
385 scanner with a 16-channel head-coil. High-resolution T1-weighted images were collected with the  
386 following parameters: field of view (FOV) =  $256 \times 256 \text{ mm}^2$ , flip angle =  $12^\circ$ , slice thickness = 1  
387 mm, in-plane pixel size  $1 \times 1 \text{ mm}^2$ , axial slices = 172. Diffusion weighted images were collected,  
388 with the following parameters: TR = 10000 ms, TE = 82, FOV =  $256 \times 256 \text{ mm}^2$ , slice thickness  
389 = 2 mm, in-plane pixel size  $1 \times 1 \text{ mm}^2$ , axial slices = 68, and number of directions = 60 with a b-  
390 value of  $1000 \text{ s/mm}^2$ . Five volumes with no diffusion weighting (b-value =  $0 \text{ s/mm}^2$ ) were  
391 acquired at the start of the protocol. Resting-state fMRI images were collected with an EPI  
392 sequence with the following parameters: TR = 2000 ms; TE = 30s; FOV =  $220 \times 220 \text{ mm}^2$ ; flip  
393 angle =  $75^\circ$ ; slice thickness = 3.4 mm; in-plane pixel size  $3.44 \times 3.44 \text{ mm}^2$  and axial slices = 43.  
394 The first 8 s of acquisition in each run were excluded due to T1 equilibration effects. Participants  
395 were instructed to stay as still as possible, close their eyes, not fall asleep, and think of nothing in  
396 particular.

397

### 398 **Data preprocessing**

399 All images were preprocessed using tools from the FMRIB FSL library (FSL 6.0.4(55)). Structural  
400 images were skull-stripped using BET(56) and segmented into white-matter, gray-matter, and  
401 cerebrospinal fluid (CSF) masks using FAST(57). As a proxy of total intracranial volume (TIV),  
402 the volume of grey-matter and white-matter masks were summed.

403 For resting-state fMRI images, data were skull-stripped, slice-time corrected, smoothed  
404 using a 6 mm FWHM kernel, and filtered using a band-pass filter (.02 to .001 Hz). To further

405 remove signal of no interest, we used a strict denoising procedure: the six head motion parameters,  
406 their squared parameters, and the temporal derivatives of both were estimated. Signal from the  
407 WM and CSF was identified by averaging the time course within the respective masks; these masks  
408 were eroded once to ensure no overlap between tissue types. The 24 movement parameters,  
409 together with the WM and CSF time courses, were then regressed out from the data through  
410 multiple regression. Finally, high motion timepoints and their immediately adjacent volumes were  
411 removed (motion scrubbing) if they exceeded one of three criteria: timepoints with a framewise  
412 displacement larger than 0.7, timepoints exceeding 2.3 standard deviations of the mean signal, or  
413 a derivative of the root mean squared over voxels (i.e. DVARS) larger than 2.3. Functional images  
414 were normalized to standard MNI space using a two-step process. First, they were registered from  
415 functional to T1 structural space using boundary-based registration. Then, images were  
416 transformed from structural space to MNI by applying a 12 degrees-of-freedom linear  
417 transformation (FLIRT(58)), followed by a non-linear transformation (FNIRT). Subjects with less  
418 than 5 minutes of resting-state data after scrubbing were excluded (N = 3). Four additional subjects  
419 were excluded from analyses due to technical/image problems (see Supplementary Fig. 1). The  
420 final rsfMRI sample included 141 subjects.

421 Diffusion weighted images were visually inspected for obvious artefacts and corrected for  
422 eddy current distortions and head movement using EDDY(59). Then, a tensor was fit to the data,  
423 and principal directions were calculated using DTIFIT. To account for possible crossing-fibers, a  
424 Bayesian estimation of the principal directions was performed with BEDPOSTX(60), modelling  
425 up to three principal directions. Transformation matrices from subject space to MNI were obtained  
426 using FLIRT and FNIRT. For diffusion tensor imaging quality control, we used QUAD and  
427 SQUAD(61); subjects scoring as group outliers in absolute/relative displacement (N = 5) or signal

428 to noise ratio/contrast to noise ratio ( $N = 1$ ) were excluded. Eight other subjects were excluded due  
429 to technical issues with the data (see Supplementary Fig. 1). The final DTI sample includes 129  
430 subjects.

431

## 432 **Extraction of brain connectivity features**

433 To sample brain connectivity at a comprehensive yet interpretable scale, we used the Harvard-  
434 Oxford Cortical and Subcortical atlas. This atlas is composed of 115 brain regions and spans major  
435 brain networks. Due to field-of-view coverage and in line with our previous research, we excluded  
436 regions of interest (ROIs) within the cerebellum and the brainstem, resulting in a total of 105  
437 cortical and subcortical ROIs (Supplementary Fig. 2A, B). For functional connectivity analyses,  
438 the average time course of each ROI was correlated to the time courses of all other ROIs, resulting  
439 in a  $105 \times 105$  connectivity matrix. Since the matrix is symmetric, only the lower triangle of the  
440 connectivity matrix was kept, for a total of 5460 features per subject. Correlation ( $r$ ) values were  
441 converted to z scores using the Fisher r-to-z conversion to approximate a normal distribution. For  
442 structural connectivity analyses, we first generated a white-matter/gray-matter interface mask by  
443 intersecting FSL's white-matter and gray matter tissue priors at 25% probability (Supplementary  
444 Fig. 2C). Then, probabilistic tractography was ran using `probtrackx2(60)`, seeding only from  
445 voxels within the ROIs that are included in the WM/GM interface mask. For each voxel within  
446 each ROI, 5000 streamlines were seeded, and the number of connections reaching each other ROI  
447 was counted, again resulting in a  $105 \times 105$  WM connectivity matrix per subject. As distance  
448 between ROIs can influence connectivity results and introduce a head-size bias, WM connectivity  
449 count was corrected for distance by multiplying the number of streamlines by the Euclidian  
450 distance between the two ROIs (`--pd` option in `probtrackx2`). Finally, since the connectivity matrix

451 was undirected, we averaged the upper and lower triangles of the matrix, to obtain a single ROI-  
452 to-ROI value indicative of probability of connectivity. As with rsfMRI connectivity, this resulted  
453 in 5460 structural connectivity features.

454

## 455 **Machine-learning approach**

456 We built a machine-learning model to predict the patients' reported pain, using whole-brain,  
457 structural and functional connectivity between 105 ROIs, yielding 5460 independent variables per  
458 method. To simplify this overdetermined fit – we studied 141 and 129 participants for rsfMRI and  
459 DTI, respectively – we used a well-established method, Connectome-based Predictive Modelling,  
460 CPM(62,63). This method simplifies the fit by reducing the number of features through a  
461 univariate feature selection, followed by a simplified form of coefficient regularization (see  
462 below). Univariate feature selection is performed by correlating all 5460 brain features against a  
463 dependent variable (Fig. 1A); these are then split into two sets of features, positively and negatively  
464 correlated to the dependent variable, which yield two separate models. Features correlating  
465 significantly below a given p-value are selected, which are summed to obtain one single parameter  
466 that characterizes the connectivity strength of a given set of tracts (Fig. 1B). Finally, the model is  
467 built by fitting a line between the dependent (pain) and independent variable (brain connectivity,  
468 Fig. 1C). Out of the 5460 features, this method reduces the fit to two coefficients (slope and  
469 intercept) per (positive and negative) model, which can then be tested for generalizability in the  
470 hold-out sample.

471 To enable model generalizability, we first split the dataset into two: a discovery dataset  
472 (70% of the data) on which the model was built and a hold-out dataset (30% of the data) on which  
473 the model was validated. This was performed using the Kennard-Stone algorithm(64), which

474 divides a dataset into two or more partitions while matching them for given parameters, which we  
475 conducted based on age, sex, and TIV. Further, within the discovery dataset, we also performed a  
476 10-fold cross-validation approach (Fig. 1D). The latter was needed for two goals: 1. To impartially  
477 determine the (otherwise arbitrary) univariate feature selection p-threshold; 2. To minimize model  
478 overfitting (more details in Supplementary Material). Thus, we divided the discovery dataset into  
479 10 train and test splits and identified the p-threshold that best generalized within the discovery  
480 dataset (range of  $p = 0.001$  to  $p = 0.1$ , p-value selected based on the best predictive performance,  
481 see Supplementary Fig. 3, 4). Finally, to generate a final model that can be tested in the hold-out  
482 sample and is consistent with other studies(62,65), we only kept features that appear on all of the  
483 CV folds; these were singled-out and refitted back to the whole discovery dataset (Fig. 1E). The  
484 resulting linear regression model was then used to generate predictions in the hold-out sample to  
485 assess generalizability (Fig. 1F). Performance metrics reported here are the correlation between  
486 predicted pain scores by the model and actual pain scores reported by the subject ( $r_{\text{predvsactual}}$ ).  
487 Functional and structural connectivity were modelled separately. As an additional quality control  
488 step, within the discovery and hold-out datasets, we exclude outliers – participants whose mean  
489 connectivity values are more than two standard deviations away from the group mean  
490 connectivity(66). This led to an exclusion of four participants from the rsfMRI dataset (all from  
491 the discovery dataset) and four participants from the DTI dataset (two from the discovery dataset,  
492 two from the hold-out dataset).

493

#### 494 **Assessing generalizability of the machine-learning results**

495 The above method can also be applied to less constrained models. To test the generalizability of  
496 the machine-learning pipeline under less stringent conditions, we tested the predictive ability of a

497 simpler model by also performing univariate feature selection but instead feeding the selected  
498 features directly into a linear regression (i.e. not separating positive and negative correlations, and  
499 not summing all features into a single value). Again, in each CV-fold, significant features are  
500 selected and the threshold is determined by selecting the best performing model using the CV-  
501 samples. Models were validated like above. The same discovery and hold-out samples were used.

502

### 503 **Acknowledgements**

504 The authors would like to thank all members of the Apkarian lab for their feedback on the  
505 manuscript. This work was supported by the Office of the Assistant Secretary of Defense for  
506 Health Affairs under award W81XWH-15-1-0603. Opinions, interpretations, conclusions, and  
507 recommendations are those of the authors and are not necessarily endorsed by the Department of  
508 Defense. This work was further supported by National Institutes of Health grant P50 DA044121  
509 and grant R01AR074274-01A1.

510

511

### 512 **References**

- 513 1. Thurman DJ, Alverson C, Dunn KA, Guerrero J, Sniezek JE. Traumatic Brain Injury in the  
514 United States: A Public Health Perspective: *Journal of Head Trauma Rehabilitation*. 1999  
515 Dec;14(6):602–15.
- 516 2. Hartvigsen J, Boyle E, Cassidy JD, Carroll LJ. Mild Traumatic Brain Injury After Motor Vehicle  
517 Collisions: What Are the Symptoms and Who Treats Them? A Population-Based 1-Year  
518 Inception Cohort Study. *Archives of Physical Medicine and Rehabilitation*. 2014  
519 Mar;95(3):S286–94.
- 520 3. Sterling M, Jull G, Kenardy J. Physical and psychological factors maintain long-term  
521 predictive capacity post-whiplash injury. *Pain*. 2006 May;122(1):102–8.
- 522 4. Khokhar BR, Lindberg MA, Walker WC. Post-mTBI Pain Interference in a U.S. Military  
523 Population: A Chronic Effects of Neurotrauma Consortium Study. *Military Medicine*. 2021  
524 Feb 26;186(3–4):e293–9.

- 525 5. Pettersson K, Hildingsson C, Toolanen G, Fagerlund M, Björnebrink J. MRI and neurology in  
526 acute whiplash trauma: No correlation in prospective examination of 39 cases. *Acta*  
527 *Orthopaedica Scandinavica*. 1994 Jan;65(5):525–8.
- 528 6. Anderson SE, Boesch C, Zimmermann H, Busato A, Hodler J, Bingisser R, et al. Are There  
529 Cervical Spine Findings at MR Imaging That Are Specific to Acute Symptomatic Whiplash  
530 Injury? A Prospective Controlled Study with Four Experienced Blinded Readers. *Radiology*.  
531 2012 Feb;262(2):567–75.
- 532 7. Ronnen HR, de Korte PJ, Brink PR, van der Bijl HJ, Tonino AJ, Franke CL. Acute whiplash  
533 injury: is there a role for MR imaging?--a prospective study of 100 patients. *Radiology*.  
534 1996 Oct;201(1):93–6.
- 535 8. Kuperman P, Granovsky Y, Granot M, Bahouth H, Fadel S, Hyams G, et al. Psychophysic-  
536 psychological dichotomy in very early acute mTBI pain: A prospective study. *Neurology*.  
537 2018 Sep 4;91(10):e931–8.
- 538 9. Kuperman P, Granovsky Y, Bahouth H, Fadel S, Ben Lulu H, Bosak N, et al. Explaining very  
539 early acute mild traumatic brain injury after motor vehicle collision pain variability:  
540 additive value of pain sensitivity questionnaire. *PR9*. 2020 May;5(3):e821.
- 541 10. Sarrami P, Armstrong E, Naylor JM, Harris IA. Factors predicting outcome in whiplash injury:  
542 a systematic meta-review of prognostic factors. *J Orthopaed Traumatol*. 2017  
543 Mar;18(1):9–16.
- 544 11. Van Oosterwijck J, Nijs J, Meeus M, Paul L. Evidence for central sensitization in chronic  
545 whiplash: A systematic literature review: Systematic review: Central sensitization in  
546 chronic WAD. *EJP*. 2013 Mar;17(3):299–312.
- 547 12. Saadon-Grosman N, Arzy S, Loewenstein Y. Hierarchical cortical gradients in somatosensory  
548 processing. *NeuroImage*. 2020 Nov;222:117257.
- 549 13. Behrens TEJ, Johansen-Berg H, Woolrich MW, Smith SM, Wheeler-Kingshott CAM, Boulby  
550 PA, et al. Non-invasive mapping of connections between human thalamus and cortex using  
551 diffusion imaging. *Nat Neurosci*. 2003 Jul;6(7):750–7.
- 552 14. Grömping U. Relative Importance for Linear Regression in *R* : The Package **relaimpo**. *J Stat*  
553 *Soft* [Internet]. 2006 [cited 2021 Jul 20];17(1). Available from:  
554 <http://www.jstatsoft.org/v17/i01/>
- 555 15. Wager TD, Atlas LY, Lindquist MA, Roy M, Woo C-W, Kross E. An fMRI-Based Neurologic  
556 Signature of Physical Pain. *N Engl J Med*. 2013 Apr 11;368(15):1388–97.
- 557 16. Lee J-J, Kim HJ, Čeko M, Park B, Lee SA, Park H, et al. A neuroimaging biomarker for  
558 sustained experimental and clinical pain. *Nat Med*. 2021 Jan;27(1):174–82.



- 559 17. Spisak T, Kincses B, Schlitt F, Zunhammer M, Schmidt-Wilcke T, Kincses ZT, et al. Pain-free  
560 resting-state functional brain connectivity predicts individual pain sensitivity. *Nat*  
561 *Commun.* 2020 Dec;11(1):187.
- 562 18. Sterling M, Jull G, Vicenzino B, Kenardy J. Characterization of acute whiplash-associated  
563 disorders. *Spine (Phila Pa 1976)*. 2004 Jan 15;29(2):182–8.
- 564 19. Leth-Petersen S, Rotger GP. Long-term labour-market performance of whiplash claimants. *J*  
565 *Health Econ.* 2009 Sep;28(5):996–1011.
- 566 20. Jensen KB, Regenbogen C, Ohse MC, Frasnelli J, Freiherr J, Lundström JN. Brain activations  
567 during pain: a neuroimaging meta-analysis of patients with pain and healthy controls.  
568 *Pain.* 2016 Jun;157(6):1279–86.
- 569 21. Petrof I, Viaene AN, Sherman SM. Properties of the primary somatosensory cortex  
570 projection to the primary motor cortex in the mouse. *Journal of Neurophysiology.* 2015  
571 Apr;113(7):2400–7.
- 572 22. Umeda T, Isa T, Nishimura Y. The somatosensory cortex receives information about motor  
573 output. *Sci Adv.* 2019 Jul;5(7):eaaw5388.
- 574 23. Lin LD, Murray GM, Sessle BJ. The effect of bilateral cold block of the primate face primary  
575 somatosensory cortex on the performance of trained tongue-protrusion task and biting  
576 tasks. *Journal of Neurophysiology.* 1993 Sep 1;70(3):985–96.
- 577 24. Brochier T, Boudreau M-J, Paré M, Smith AM. The effects of muscimol inactivation of small  
578 regions of motor and somatosensory cortex on independent finger movements and force  
579 control in the precision grip. *Experimental Brain Research.* 1999 Sep 3;128(1–2):31–40.
- 580 25. Pavlides C, Miyashita E, Asanuma H. Projection from the sensory to the motor cortex is  
581 important in learning motor skills in the monkey. *Journal of Neurophysiology.* 1993 Aug  
582 1;70(2):733–41.
- 583 26. Hiraba, Yayoi Yamaguchi, Hironori S H. Deficits of masticatory movements caused by lesions  
584 in the orofacial somatosensory cortex of the awake cat. *Somatosensory & Motor*  
585 *Research.* 2000 Jan;17(4):361–72.
- 586 27. Angel RW, Malenka RC. Velocity-dependent suppression of cutaneous sensitivity during  
587 movement. *Experimental Neurology.* 1982 Aug;77(2):266–74.
- 588 28. Jiang W, Chapman CE, Lamarre Y. Modulation of somatosensory evoked responses in the  
589 primary somatosensory cortex produced by intracortical microstimulation of the motor  
590 cortex in the monkey. *Exp Brain Res [Internet].* 1990 Apr [cited 2021 Jul 20];80(2).  
591 Available from: <http://link.springer.com/10.1007/BF00228160>

- 592 29. Cui F, Arnstein D, Thomas RM, Maurits NM, Keyzers C, Gazzola V. Functional Magnetic  
593 Resonance Imaging Connectivity Analyses Reveal Efference-Copy to Primary  
594 Somatosensory Area, BA2. Liu Y, editor. PLoS ONE. 2014 Jan 8;9(1):e84367.
- 595 30. Biswal B, Zerrin Yetkin F, Houghton VM, Hyde JS. Functional connectivity in the motor  
596 cortex of resting human brain using echo-planar mri. Magn Reson Med. 1995  
597 Oct;34(4):537–41.
- 598 31. Holmes SA, Kim A, Borsook D. The brain and behavioral correlates of motor-related  
599 analgesia (MRA). Neurobiology of Disease. 2021 Jan;148:105158.
- 600 32. Emerson NM, Zeidan F, Lobanov OV, Hadsel MS, Martucci KT, Quevedo AS, et al. Pain  
601 Sensitivity is Inversely Related to Regional Grey Matter Density in the Brain. Pain. 2014  
602 Mar;155(3):566–73.
- 603 33. Erpelding N, Moayedi M, Davis KD. Cortical thickness correlates of pain and temperature  
604 sensitivity. Pain. 2012 Aug;153(8):1602–9.
- 605 34. Liu Y, Latremoliere A, Li X, Zhang Z, Chen M, Wang X, et al. Touch and tactile neuropathic  
606 pain sensitivity are set by corticospinal projections. Nature. 2018 Sep;561(7724):547–50.
- 607 35. Duhamel J-R, Colby CL, Goldberg ME. Ventral Intraparietal Area of the Macaque: Congruent  
608 Visual and Somatic Response Properties. Journal of Neurophysiology. 1998 Jan  
609 1;79(1):126–36.
- 610 36. Lobanov OV, Quevedo AS, Hadsel MS, Kraft RA, Coghill RC. Frontoparietal mechanisms  
611 supporting attention to location and intensity of painful stimuli. Pain. 2013  
612 Sep;154(9):1758–68.
- 613 37. Yeterian EH, Pandya DN. Corticothalamic connections of the posterior parietal cortex in the  
614 rhesus monkey. J Comp Neurol. 1985 Jul 15;237(3):408–26.
- 615 38. Tu Y, Fu Z, Mao C, Falahpour M, Gollub RL, Park J, et al. Distinct thalamocortical network  
616 dynamics are associated with the pathophysiology of chronic low back pain. Nat Commun.  
617 2020 Dec;11(1):3948.
- 618 39. Baliki MN, Geha PY, Apkarian AV, Chialvo DR. Beyond Feeling: Chronic Pain Hurts the Brain,  
619 Disrupting the Default-Mode Network Dynamics. Journal of Neuroscience. 2008 Feb  
620 6;28(6):1398–403.
- 621 40. Belin P, Zatorre RJ, Ahad P. Human temporal-lobe response to vocal sounds. Brain Res Cogn  
622 Brain Res. 2002 Feb;13(1):17–26.
- 623 41. Assaf Y, Pasternak O. Diffusion Tensor Imaging (DTI)-based White Matter Mapping in Brain  
624 Research: A Review. J Mol Neurosci. 2008 Jan 1;34(1):51–61.

- 625 42. Jones DK, Cercignani M. Twenty-five pitfalls in the analysis of diffusion MRI data. *NMR*  
626 *Biomed.* 2010 Aug;23(7):803–20.
- 627 43. Palacios EM, Owen JP, Yuh EL, Wang MB, Vassar MJ, Ferguson AR, et al. The evolution of  
628 white matter microstructural changes after mild traumatic brain injury: A longitudinal DTI  
629 and NODDI study. *Sci Adv.* 2020 Aug;6(32):eaaz6892.
- 630 44. Yuh EL, Cooper SR, Mukherjee P, Yue JK, Lingsma HF, Gordon WA, et al. Diffusion tensor  
631 imaging for outcome prediction in mild traumatic brain injury: a TRACK-TBI study. *J*  
632 *Neurotrauma.* 2014 Sep 1;31(17):1457–77.
- 633 45. Genc S, Anderson V, Ryan NP, Malpas CB, Catroppa C, Beauchamp MH, et al. Recovery of  
634 White Matter following Pediatric Traumatic Brain Injury Depends on Injury Severity.  
635 *Journal of Neurotrauma.* 2017 Feb 15;34(4):798–806.
- 636 46. Tavor I, Botvinik-Nezer R, Bernstein-Eliav M, Tsarfaty G, Assaf Y. Short-term plasticity  
637 following motor sequence learning revealed by diffusion magnetic resonance imaging.  
638 *Human Brain Mapping.* 2020;41(2):442–52.
- 639 47. Hofstetter S, Tavor I, Moryosef ST, Assaf Y. Short-Term Learning Induces White Matter  
640 Plasticity in the Fornix. *J Neurosci.* 2013 Jul 31;33(31):12844–50.
- 641 48. Greicius MD, Supekar K, Menon V, Dougherty RF. Resting-State Functional Connectivity  
642 Reflects Structural Connectivity in the Default Mode Network. *Cereb Cortex.* 2009  
643 Jan;19(1):72–8.
- 644 49. Honey CJ, Sporns O, Cammoun L, Gigandet X, Thiran JP, Meuli R, et al. Predicting human  
645 resting-state functional connectivity from structural connectivity. *PNAS.* 2009 Feb  
646 10;106(6):2035–40.
- 647 50. Gil C, Decq P. How similar are whiplash and mild traumatic brain injury? A systematic  
648 review. *Neurochirurgie.* 2021 May;67(3):238–43.
- 649 51. Zigmond AS, Snaith RP. The hospital anxiety and depression scale. *Acta Psychiatr Scand.*  
650 1983 Jun;67(6):361–70.
- 651 52. Sullivan MJL, Bishop SR, Pivik J. The Pain Catastrophizing Scale: Development and validation.  
652 *Psychological Assessment.* 1995;7(4):524–32.
- 653 53. Ruscheweyh R, Marziniak M, Stumpfenhorst F, Reinholz J, Knecht S. Pain sensitivity can be  
654 assessed by self-rating: Development and validation of the Pain Sensitivity Questionnaire.  
655 *Pain.* 2009 Nov;146(1–2):65–74.
- 656 54. Cohen S, Kamarck T, Mermelstein R. A global measure of perceived stress. *Journal of Health*  
657 *and Social Behavior.* 1983;24(4):385–96.

- 658 55. Jenkinson M, Beckmann CF, Behrens TEJ, Woolrich MW, Smith SM. FSL. *NeuroImage*. 2012  
659 Aug 15;62(2):782–90.
- 660 56. Smith SM. Fast robust automated brain extraction. *Hum Brain Mapp*. 2002 Nov;17(3):143–  
661 55.
- 662 57. Zhang Y, Brady M, Smith S. Segmentation of brain MR images through a hidden Markov  
663 random field model and the expectation-maximization algorithm. *IEEE Trans Med Imaging*.  
664 2001 Jan;20(1):45–57.
- 665 58. Jenkinson M, Bannister P, Brady M, Smith S. Improved optimization for the robust and  
666 accurate linear registration and motion correction of brain images. *Neuroimage*. 2002  
667 Oct;17(2):825–41.
- 668 59. Andersson JLR, Sotiropoulos SN. An integrated approach to correction for off-resonance  
669 effects and subject movement in diffusion MR imaging. *NeuroImage*. 2016 Jan;125:1063–  
670 78.
- 671 60. Behrens TEJ, Berg HJ, Jbabdi S, Rushworth MFS, Woolrich MW. Probabilistic diffusion  
672 tractography with multiple fibre orientations: What can we gain? *Neuroimage*. 2007 Jan  
673 1;34(1):144–55.
- 674 61. Bastiani M, Cottaar M, Fitzgibbon SP, Suri S, Alfaro-Almagro F, Sotiropoulos SN, et al.  
675 Automated quality control for within and between studies diffusion MRI data using a non-  
676 parametric framework for movement and distortion correction. *NeuroImage*. 2019  
677 Jan;184:801–12.
- 678 62. Shen X, Finn ES, Scheinost D, Rosenberg MD, Chun MM, Papademetris X, et al. Using  
679 connectome-based predictive modeling to predict individual behavior from brain  
680 connectivity. *Nat Protoc*. 2017 Mar;12(3):506–18.
- 681 63. Finn ES, Shen X, Scheinost D, Rosenberg MD, Huang J, Chun MM, et al. Functional  
682 connectome fingerprinting: identifying individuals using patterns of brain connectivity. *Nat*  
683 *Neurosci*. 2015 Nov;18(11):1664–71.
- 684 64. Kennard RW, Stone LA. Computer Aided Design of Experiments. *Technometrics*. 1969  
685 Feb;11(1):137–48.
- 686 65. Rosenberg MD, Finn ES, Scheinost D, Papademetris X, Shen X, Constable RT, et al. A  
687 neuromarker of sustained attention from whole-brain functional connectivity. *Nat*  
688 *Neurosci*. 2016 Jan;19(1):165–71.
- 689 66. Yang L, Wu B, Fan L, Huang S, Vigotsky AD, Baliki MN, et al. Dissimilarity of functional  
690 connectivity uncovers the influence of participant’s motion in functional magnetic  
691 resonance imaging studies. *Human Brain Mapping*. 2021;42(3):713–23.

## 692 **Competing interests**

693 The authors declare that the research was conducted in the absence of any commercial or financial  
694 relationships that could be construed as a potential conflict of interest

695

## 696 **Figure Captions**

697

698 **Figure 1. Machine-learning pipeline to identify mTBI acute pain related brain circuitry.** We  
699 used Connectome-based Predictive Modelling approach to model large-scale connectivity. Upper  
700 panel, modelling approach: **A.** First, all pairs of connectivity within the 105 ROIs were correlated  
701 with pain (across-subjects) to select a series of significant edges (feature selection step). **B.** All  
702 significant edges were then summed into a single value (separately, for positive and negatively  
703 correlated edges, data-reduction step). **C.** This summarized pain model was then regressed against  
704 pain to obtain a linear equation predicting pain, which was tested in out-of-sample subjects. Lower-  
705 panel, validation approach: the above approach was embedded into a machine-learning algorithm  
706 that attempts to generalize the model impartially. **D.** The total sample here was separated into a  
707 discovery (70%) and a hold-out datasets (30%). Within the discovery dataset, cross-validation was  
708 conducted to impartially determine the  $p$ -threshold used in the feature selection step. **E.** To  
709 improve model stability, after the best  $p$ -value was determined, a new model was built based only  
710 on the features that were significant in all the CV folds (features occurring in 100% of the 10-fold  
711 CV iterations). **F.** Model performance was assessed within-sample by applying the linear equation  
712 to the discovery dataset and out-of-sample by applying the linear equation in the hold-out dataset  
713 to assess generalization.

714

715 **Figure 2. Structural connections between three pairs of cortical regions reflect acute mTBI**  
716 **pain.** Three features were selected by the machine-learning algorithm **(A)**, and a model was cast.  
717 The model's predicted values were significantly correlated with actual pain in the discovery dataset  
718 **(B, left)** and in the hold-out dataset **(B, middle)** with equivalent effect sizes. The model was also  
719 able to predict pain in a third independent group of mTBI patients with no whiplash-like symptoms  
720 **(B, right)**. Meta-analytical predictive performance metrics were calculated to summarize the  
721 results from the three groups **(C)**, showing again reliable associations between predicted and  
722 observed pain. **(D)** Raw connectivity strength and their association with pain are illustrated,  
723 showing a negative association whereby more connections lead to less reported pain. **(E)**  
724 Connectivity strength of the three tracts compared between subjects with WAD scores of 0, 1, and  
725 2 show no significant differences, supporting no association between symptom severity and  
726 connectivity strength. left superior parietal Lobule, L SPL; left superior lateral occipital cortex,  
727 sLOC.

728  
729 **Figure 3. Somatotopic organization of structural connectivity within the sensorimotor cortex**  
730 **and the thalamocortical system reveal topographically appropriate linkages related to acute**  
731 **mTBI pain.** Post-hoc analysis looking at left PreC-PostC and left Thal-SPL connectivity at a  
732 higher granularity. **(A)** Within the sensorimotor homunculi, the most predictive connectivity is  
733 between the face and arm ROIs. Connectivity between the precentral arm and postcentral trunk  
734 (site of injury, i.e. head/neck representation in the motor and sensory homunculi, respectively) also  
735 show significant correlation with observed pain. **(B)** For the thalamus, the strongest predictor was  
736 the VPL nuclei (top panel), together with an anterior/medial region. The VPL nuclei was also the  
737 nucleus with strongest absolute connectivity to the parietal cortex (bottom panel). \*  $p < .05$ ; \*\*  $p$

738 < .01; # survives FDR correction for multiple comparisons. Thalamus ROIs can be depicted in the  
739 bottom right panel.

740

741 **Figure 4. A multi-parameter model for predicting acute and longer-term mTBI pain. (A)**

742 Correlations between the predictive structural connectivity tracts and psychophysical-  
743 psychological variables. Higher pressure-pain conditioned pain modulation (CPM) and  
744 suprathreshold pain (Pain50) scores were associated with stronger connectivity, and lower pain  
745 sensitivity questionnaire (PSQ) scores were associated with stronger connectivity. Individually,  
746 left PreC-PostC was mostly associated with CPM, while R PP – sLOC was associated with  
747 perceived stress scale (PSS). Mechanical (Mech. TS) and electrical (Elect. TS) temporal  
748 summation, Heat-pain conditioned pain modulation (HP CPM), Pain Catastrophizing (PCS),  
749 Anxiety and Depression did not show any significant associations. **(B)** Relative importance metrics  
750 for connectivity, PSQ, CPM, and Pain50, when predicting pain. A model with the four parameters  
751 (Brain, psychological, and psychophysical parameters) explains 31% of the variance in pain, with  
752 connectivity parameters accounting for 50% of the full model variance (i.e. 15% of unique variance  
753 in observed pain).

754

755 **Figure 5. Stability of structural connectivity related to acute mTBI pain over 12 months and**

756 **their relationship to long-term mTBI pain. (A).** Model performance at predicting pain over time;

757 baseline parameters are associated with observed pain at baseline (BL), 1 month (1M), 3 months  
758 (3M), 6 months (6M) and a year (1Y, marginally significant) after a motorized vehicle crash, but  
759 not when controlling for baseline pain. **(B, left panel)** connectivity strength of the three predictive  
760 features measured at 6 months post-MVC is still significantly associated with reported pain at 6

761 months, but not at 12 months. **(B, right panel)** connectivity remains stable from baseline to 6  
762 months, and after one year. Lines represent paired differences within subject. \*  $p < .05$ ; \*\*  $p < .01$ ;  
763 \*\*\*  $p < .001$ ; &  $p = .051$ .



**A** Correlate each edge with pain across subjects

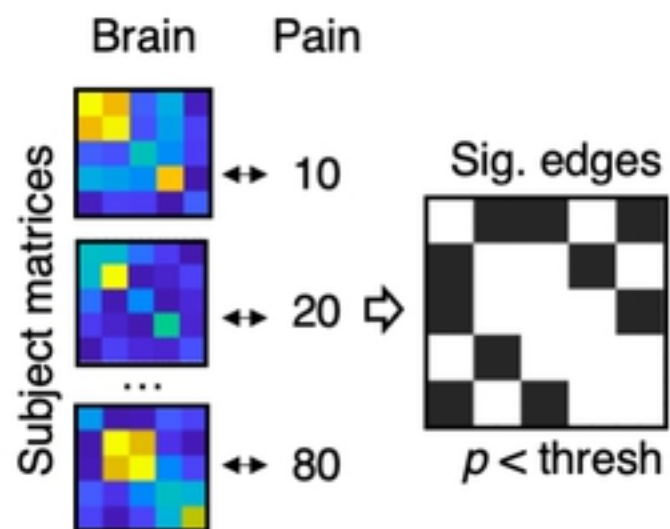

**B** Sum connectivity of significant edges

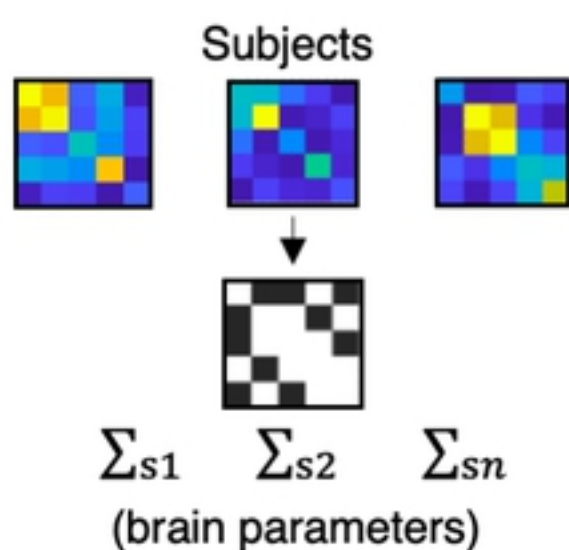

**C** Fit brain parameters to pain with a linear model

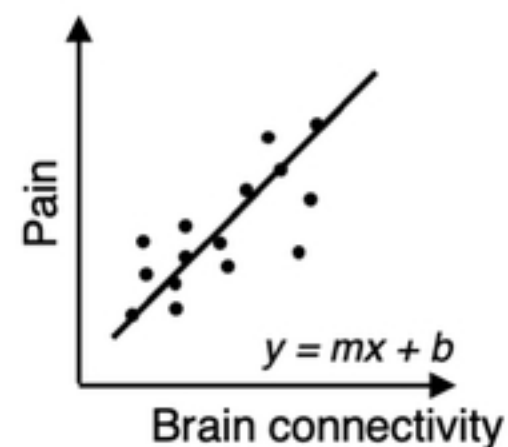

**D** Tune params. with 10-fold CV in discovery dataset

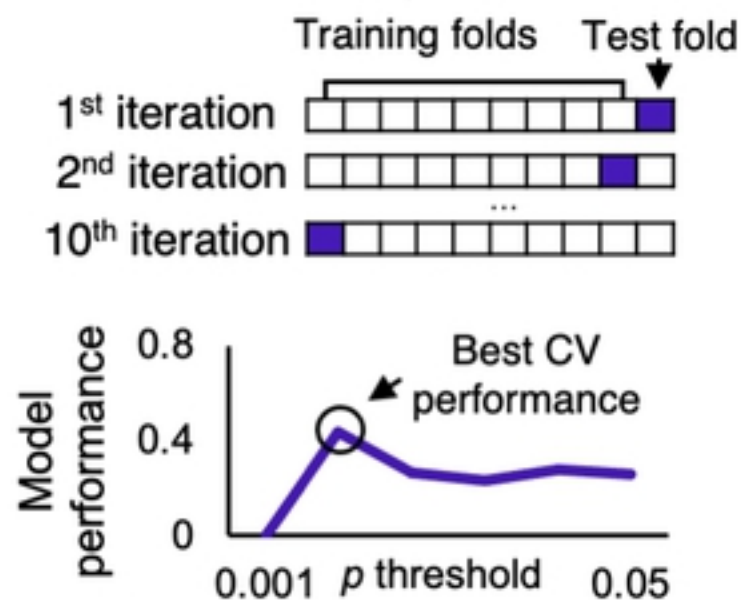

**E** Refit model with features selected in 100% of CV folds

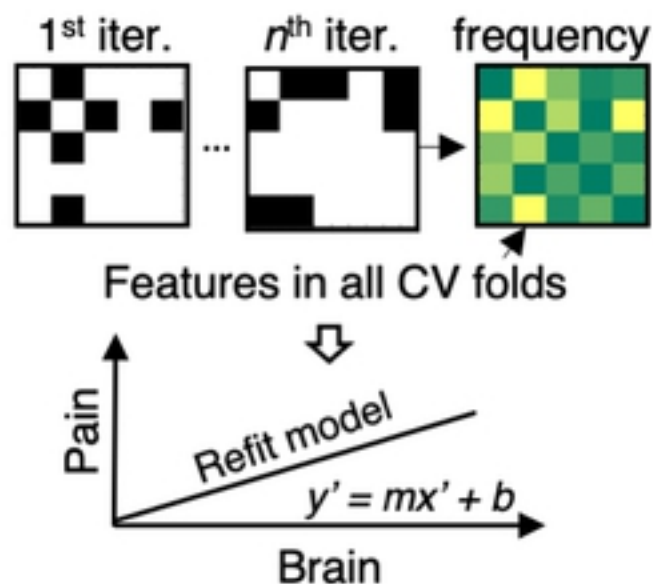

**F** Predict pain and assess model performance

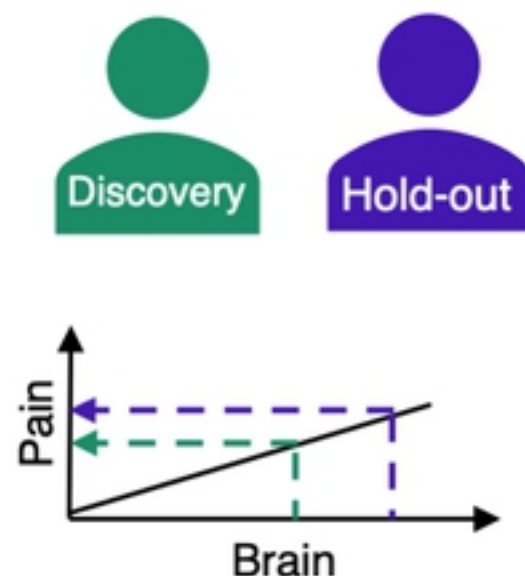

**A**

L Precentral to L Postcentral

L SPL to L Thalamus

L sLOC to R Planum Polare

bioRxiv preprint doi: <https://doi.org/10.1101/2021.11.12.468345>; this version posted November 13, 2021. The copyright holder for this preprint (which was not certified by peer review) is the author/funder, who has granted bioRxiv a license to display the preprint in perpetuity. It is made available under aCC-BY 4.0 International license.

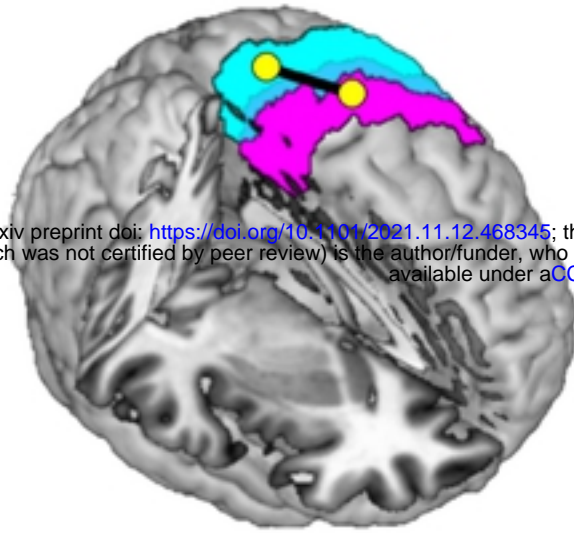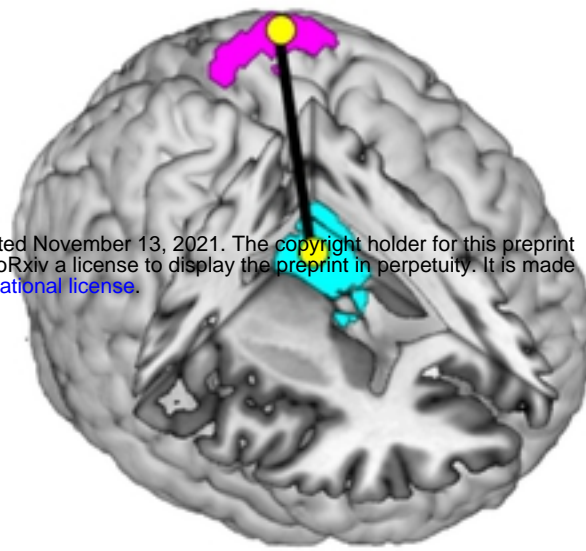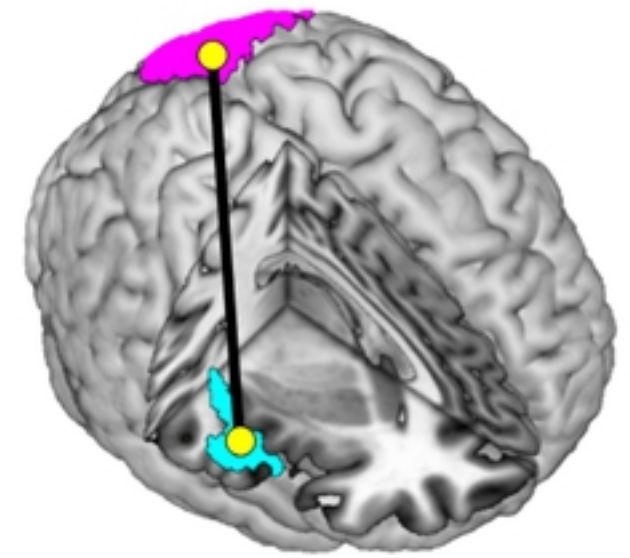**B**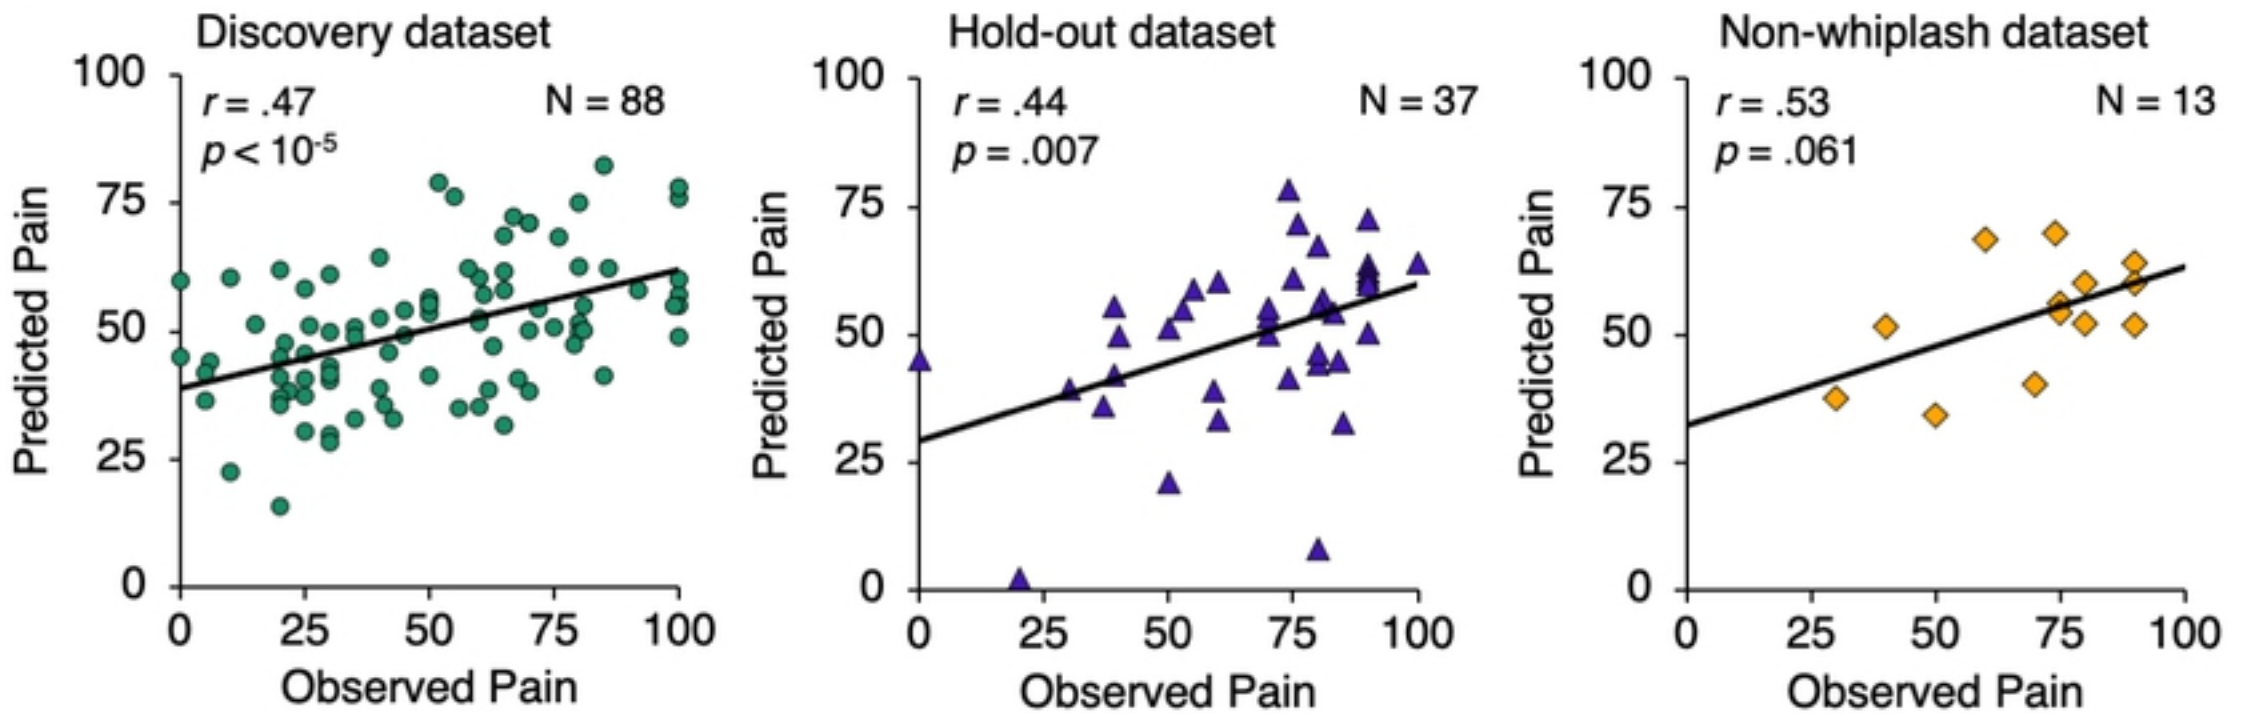**C**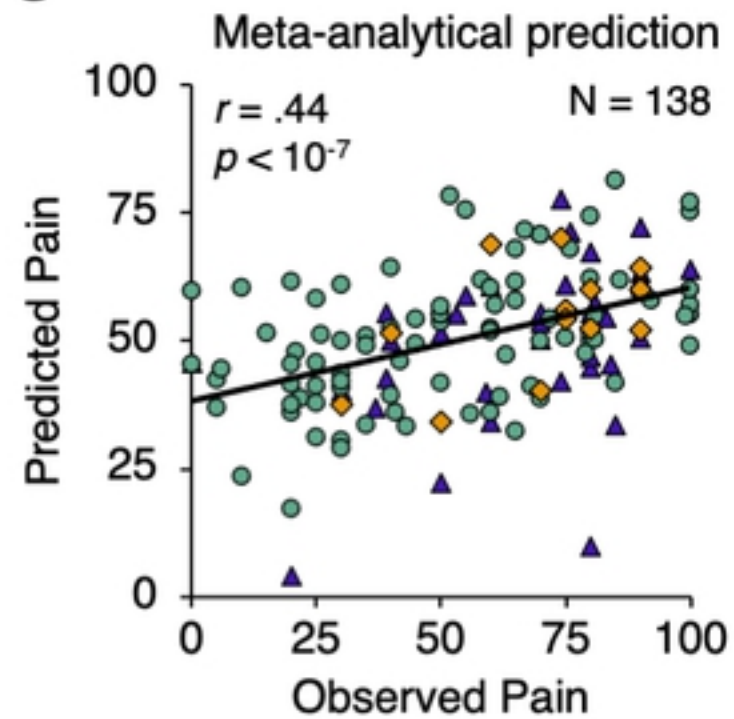**D**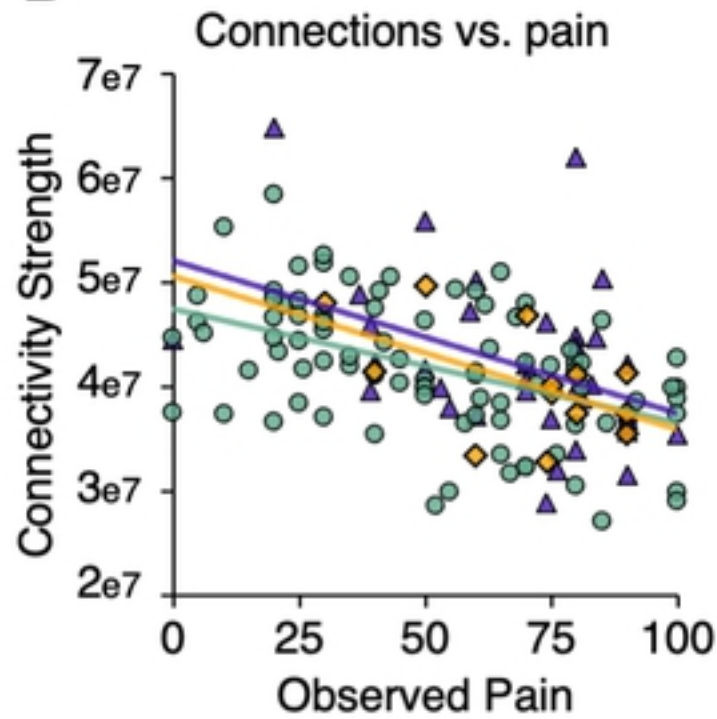**E**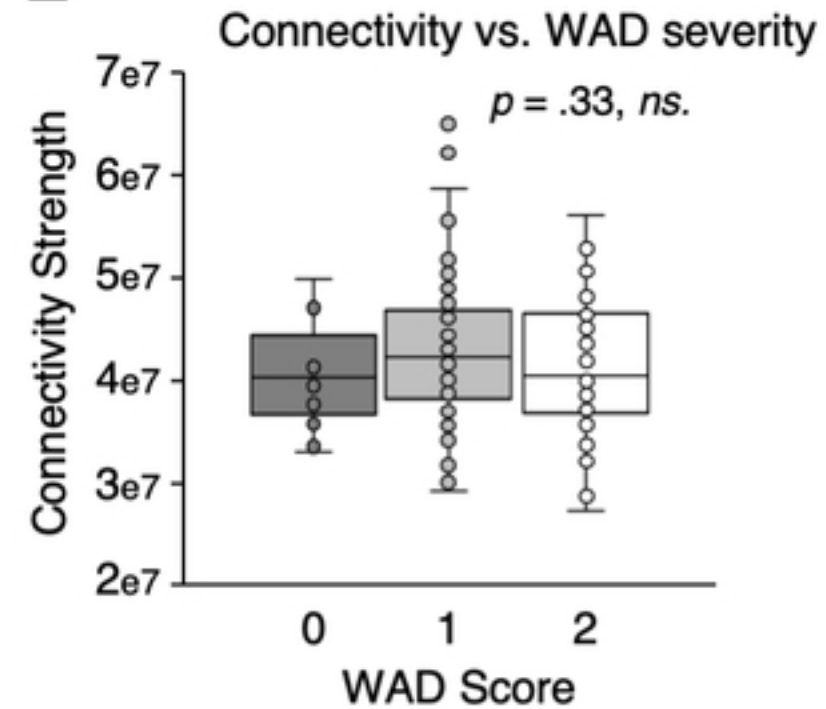

● Discovery    ▲ Hold-out    ◆ Non-whiplash

A

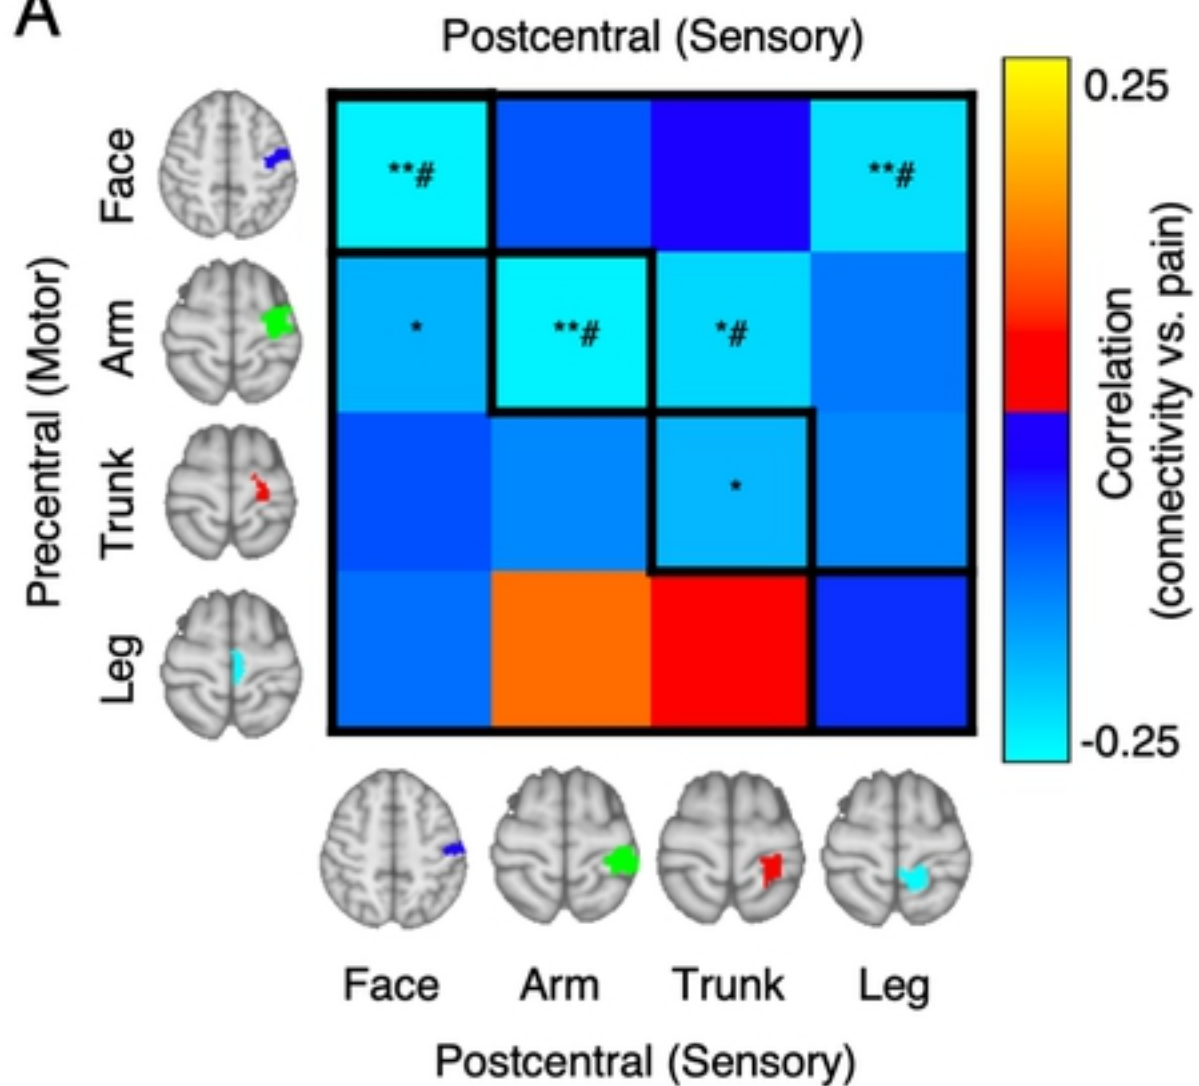

B

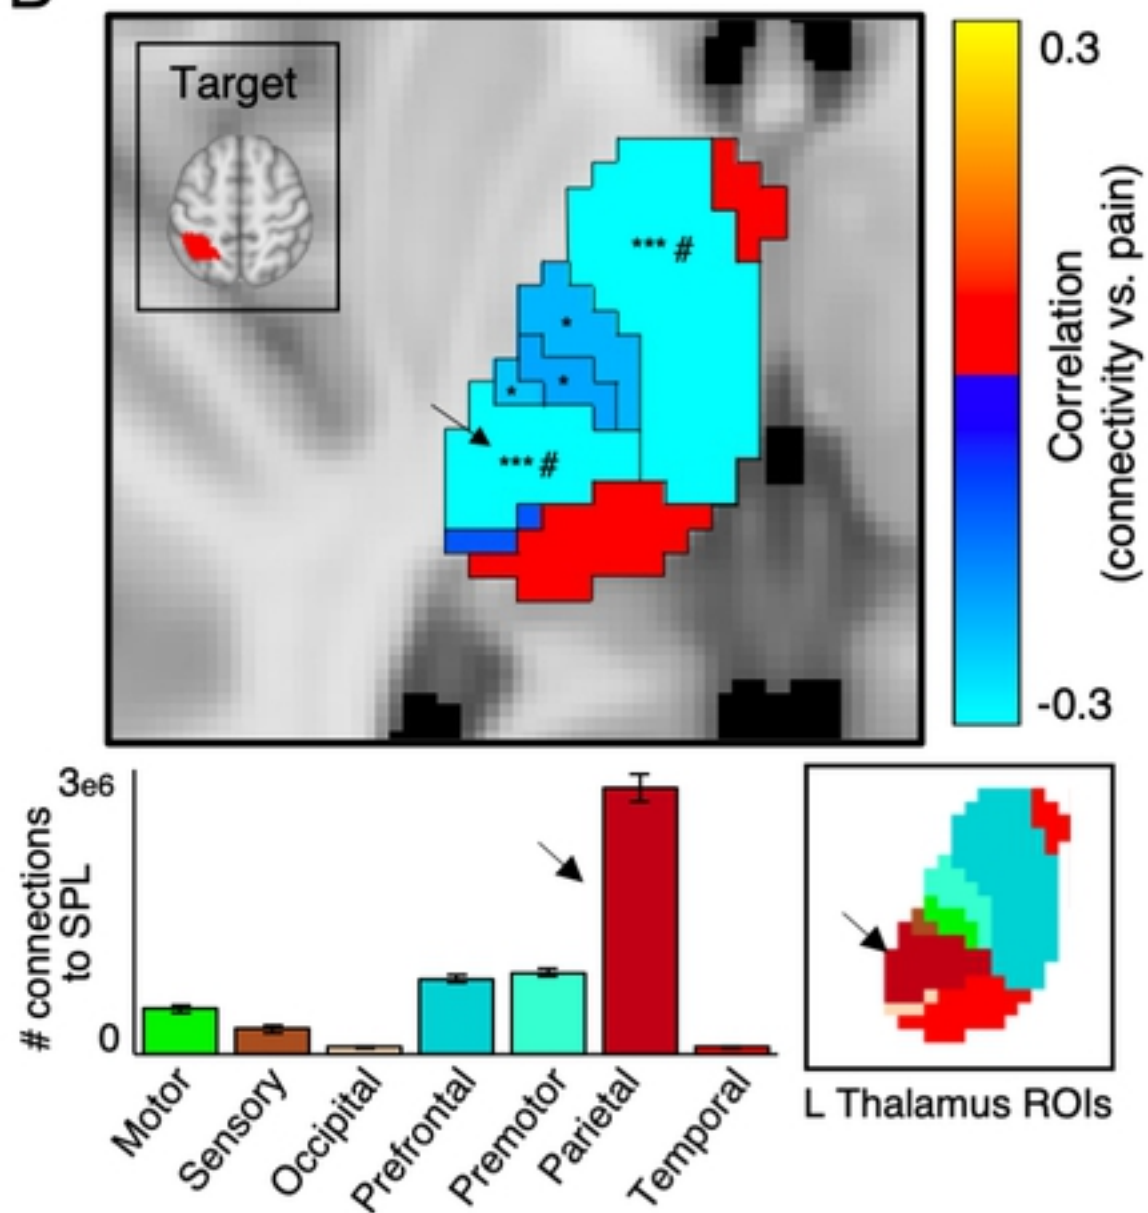



**A****All Links**

L PreC - L PostC

L Thal - L SPL

L sLOC - R PP

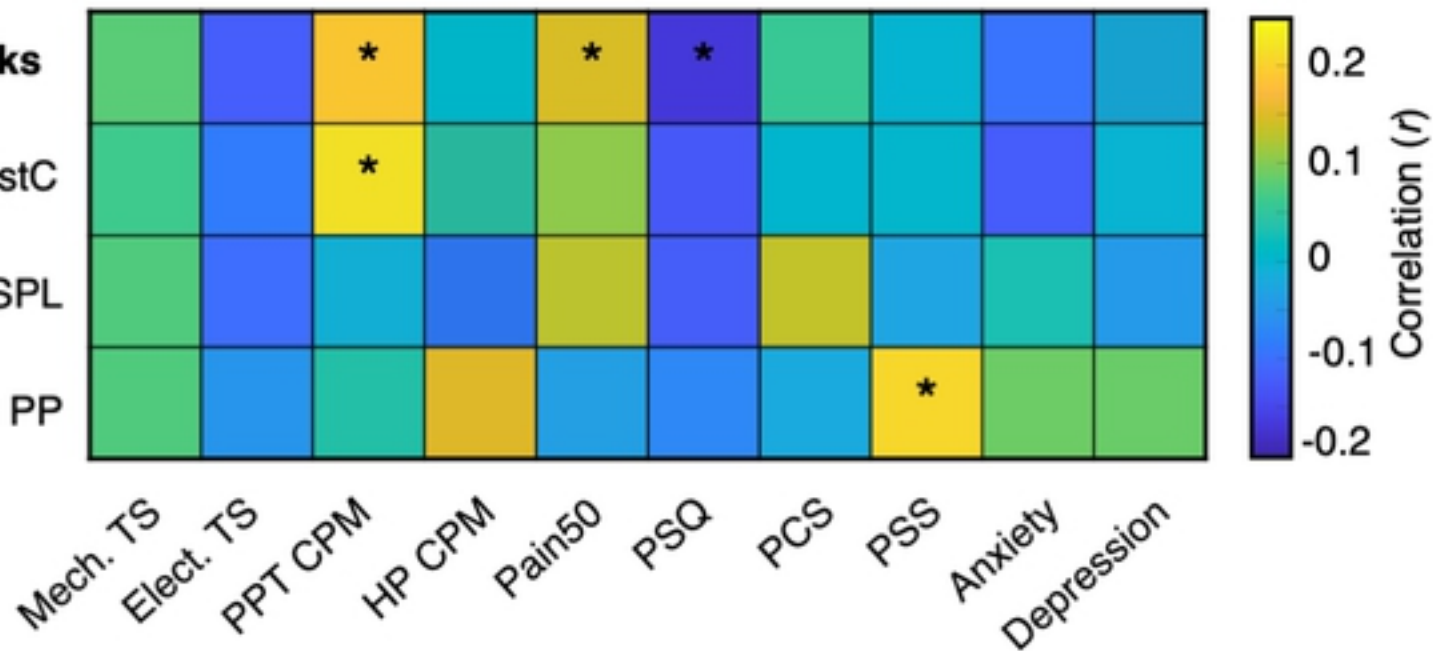**B**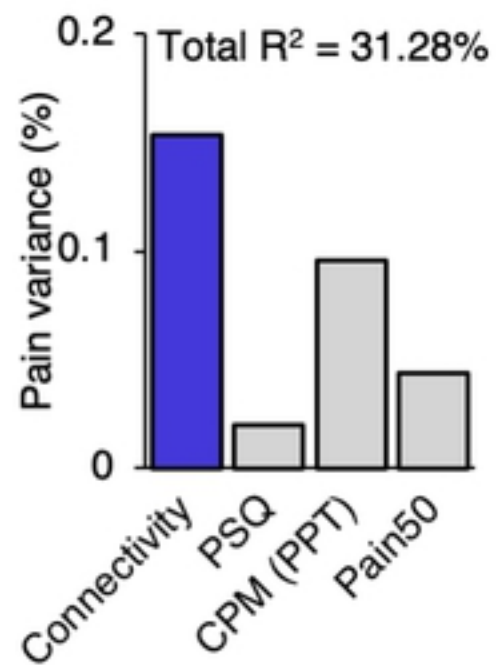

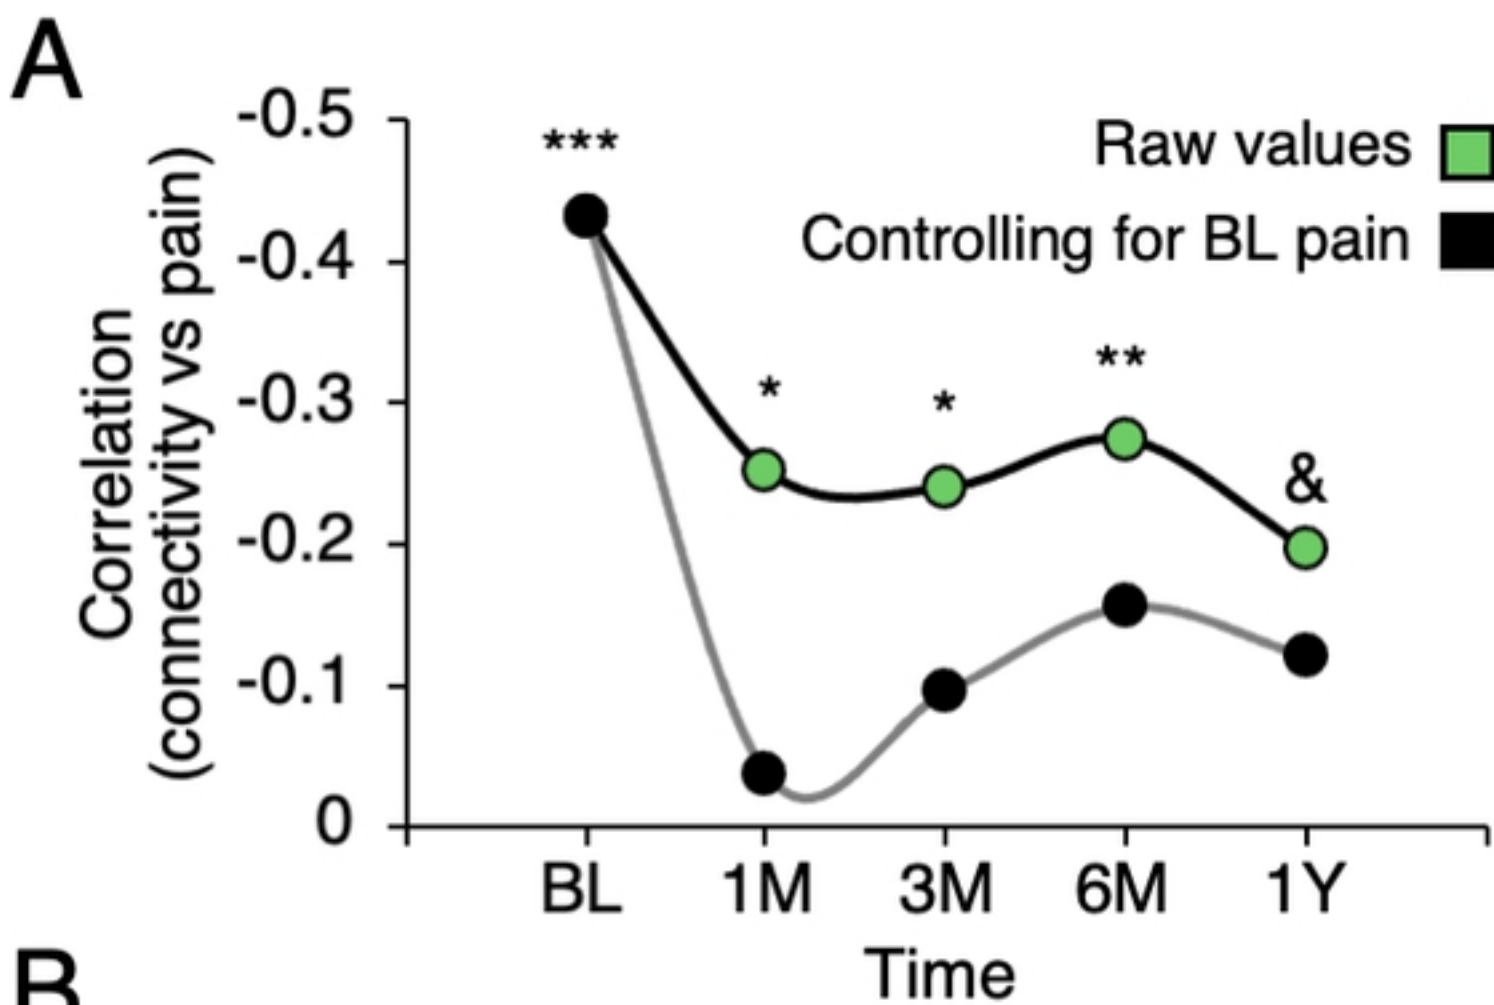

**B**

bioRxiv preprint doi: <https://doi.org/10.1101/2021.11.12.468345>; this version posted November 13, 2021. The copyright holder for this preprint (which was not certified by peer review) is the author/funder, who has granted bioRxiv a license to display the preprint in perpetuity. It is made available under aCC-BY 4.0 International license.

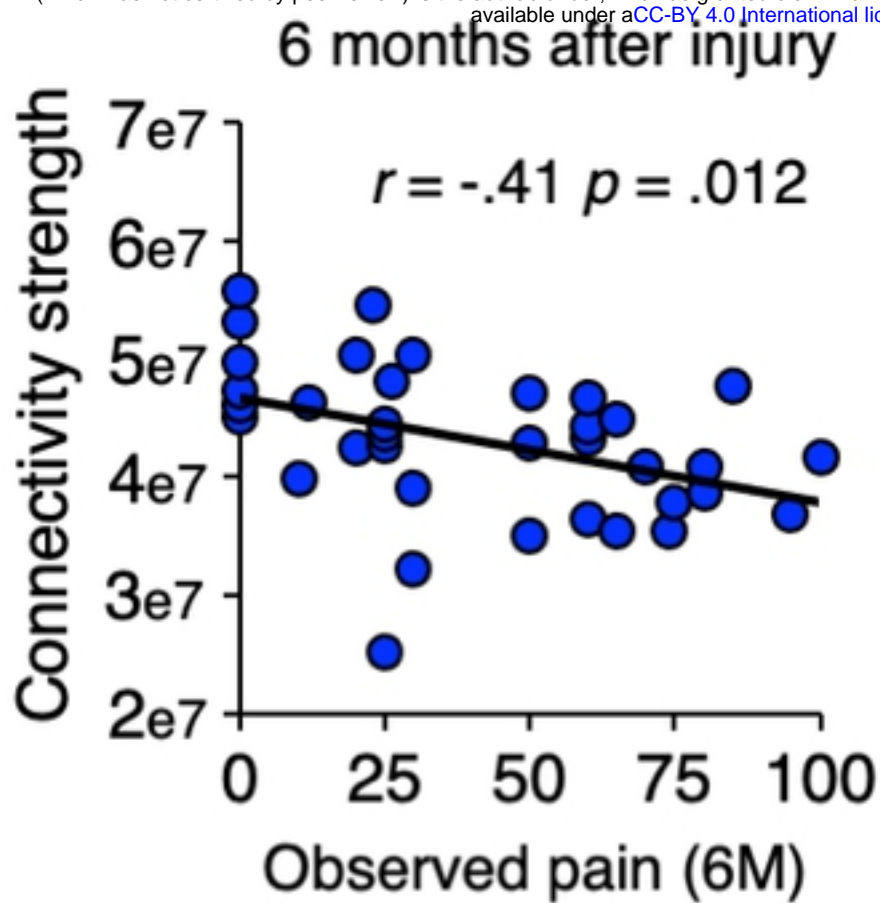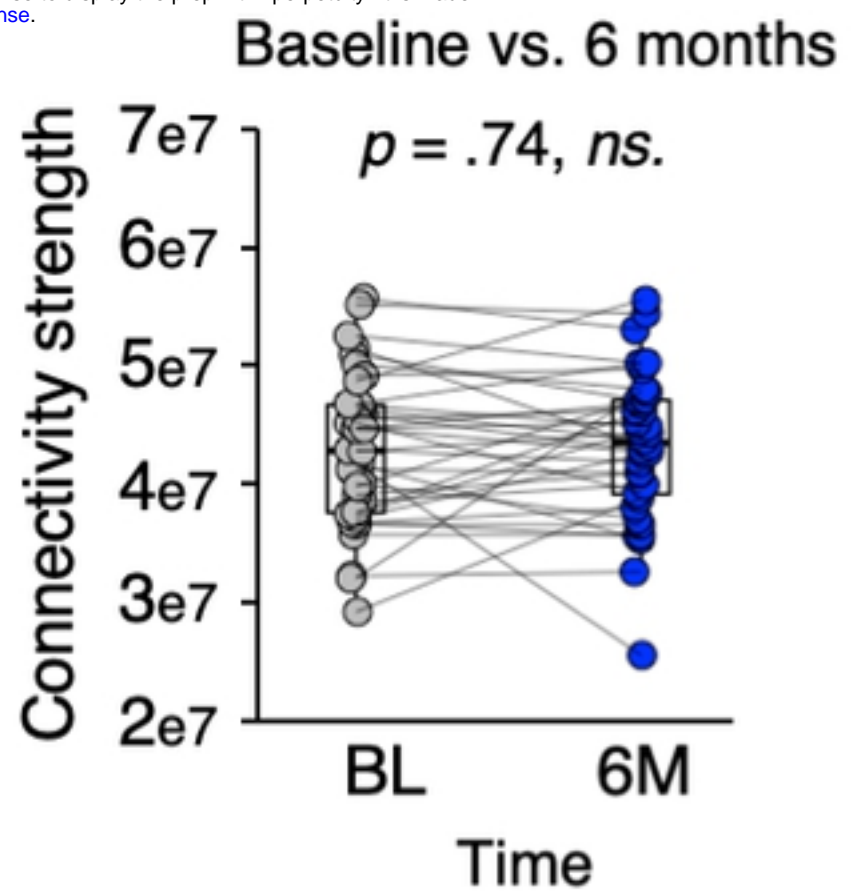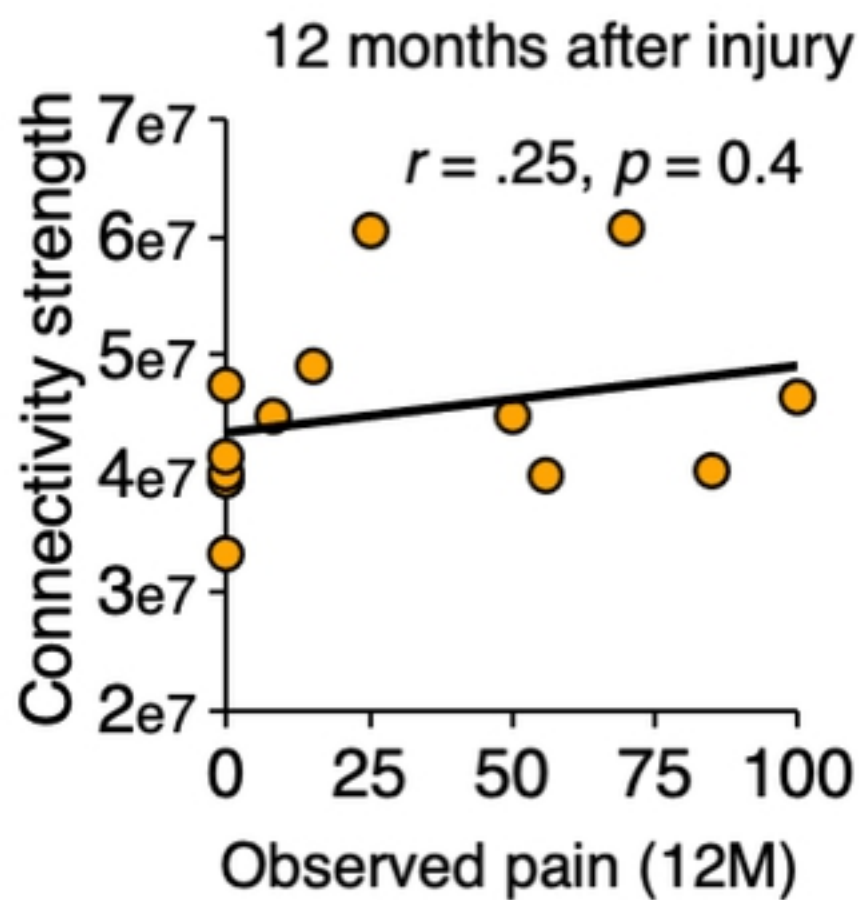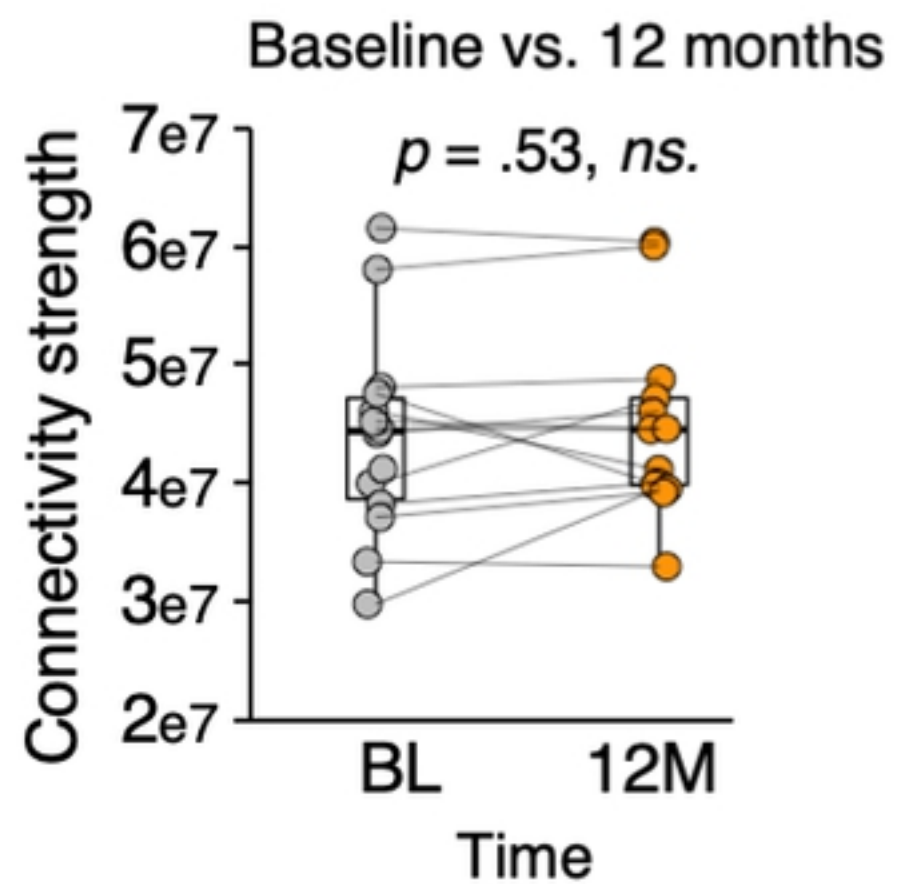

Source: https://www.biorxiv.org/content/10.1101/2021.11.12.468345v1.full.pdf
